24 ARDIG, EJP One Health) and INTERBEV (Protocol N° SECU-15-31). The funding  
25 organizations were not involved in the study design, or collection, analysis, or  
26 interpretation of the data, or writing of the manuscript. The authors declare that they  
27 have no competing interests.

## 28 **Abstract**

29 Intestinal carriage of extended spectrum  $\beta$ -lactamase (ESBL)-producing  
30 *Escherichia coli* is a frequent, increasing and worrying phenomenon, but little is  
31 known about the molecular scenario and the evolutionary forces at play. We  
32 screened 45 veal calves, known to have high prevalence of carriage, for ESBL-  
33 producing *E. coli* on 514 rectal swabs (one randomly selected colony per sample)  
34 collected over six months. We characterized the bacterial clones and plasmids  
35 carrying *bla*<sub>ESBL</sub> genes with a combination of genotyping methods, whole genome  
36 sequencing and conjugation assays. One hundred and seventy-three ESBL-  
37 producing *E. coli* isolates [*bla*<sub>CTX-M-1</sub> (64.7%), *bla*<sub>CTX-M-14</sub> (33.5%) or *bla*<sub>CTX-M-15</sub> (1.8%)]  
38 were detected, belonging to 32 bacterial clones, mostly of phylogroup A. Calves  
39 were colonized successively by different clones with a trend in decreasing carriage.  
40 The persistence of a clone in a farm was significantly associated with the number of  
41 calves colonized. Despite a high diversity of *E. coli* clones and *bla*<sub>CTX-M</sub>-carrying  
42 plasmids, few *bla*<sub>CTX-M</sub> gene/plasmid/chromosomal background combinations  
43 dominated, due to (i) efficient colonization of bacterial clones and/or (ii) successful  
44 plasmid spread in various bacterial clones. The scenario 'clone vs. plasmid spread'  
45 depended on the farm. Thus, epistatic interactions between resistance genes,  
46 plasmids and bacterial clones contribute to optimize fitness in specific environments.

47

## 48 Introduction

49 The use of extended-spectrum cephalosporins (ESC) in veterinary and human  
50 medicine has led to the emergence of extended spectrum  $\beta$ -lactamases (ESBLs),  
51 which confer resistance to these molecules. Since the 80's (1), ESBL-producing  
52 *Enterobacteriaceae* have not only widely disseminated in humans but also in food-  
53 producing animals (2–4), among which veal calves in Europe constantly harbored  
54 high ESBL intestinal rates (5, 6). Several studies have shown that CTX-M enzymes  
55 encoded by plasmid-borne genes are mostly responsible for ESC resistance in veal  
56 calves (5, 7), with those from the *bla*<sub>CTX-M</sub> groups 1 and 9 being the most prevalent  
57 (6–9). Of particular concern is also the co-occurrence of *bla*<sub>CTX-M</sub> and *mcr* genes, the  
58 latter conferring resistance to colistin, one of the last-resort antibiotics in human  
59 medicine. Indeed, the *mcr-1* gene was found at alarming levels in ESBL-producing  
60 *E. coli* isolated from feces of diarrheic veal calves (10, 11).

61 ESBL dynamics in veal calves has been studied on several occasions at farm level  
62 (9, 12). In two previous studies, a marked decrease in ESBL prevalence has been  
63 reported, over a ten-week period in three Dutch farms (12), and over the six-month  
64 period of the fattening process in ten French farms (9). An extremely high ESBL  
65 colonization at admission resulted from calves fed antimicrobial residues-containing  
66 waste milk before the first month, and administration of antibiotic collective treatment  
67 at the beginning of the fattening, in anticipation of an outbreak (9, 13, 14).  
68 Nonetheless, little attention has been paid to genomics insights at ESBL gene,  
69 plasmid or bacterial clone levels, which may inform in more detail on each of their  
70 respective contributions to ESBL spread during the fattening process.

71 Here, we followed up a previous study conducted on 45 calves distributed in three  
72 fattening farms, from one week after arrival until discharge to slaughterhouses. The

73 central objectives of the study were to clarify (i) the link between early intensity and  
74 duration of ESBL-producing *E. coli* fecal excretion, (ii) the role of plasmids versus  
75 bacterial clones in the spread of ESBL genes and (iii) the circulation of ESBL-  
76 producing *E. coli* clones among calves and their persistence in farms. In addition, we  
77 studied the molecular supports of the *mcr-1* gene within ESBL-producing *E. coli*  
78 clones. Since the intestinal microbiota is well-known as the epicenter of ESBL  
79 selection and ESBL spread in both humans and farm animals (15, 16), the new  
80 information reported here in veal calves also contributes to a better understanding of  
81 ESBL intestinal spread in general, notably in humans.

82

## 83 **Material and method**

### 84 **Study design and animal selection**

85 The study was performed in three veal farms (A, B and C) located in the region of  
86 Brittany, France. Seven days after their arrival in farms, 50 randomly selected calves  
87 per farm were screened for intestinal carriage of ESBL-producing *E. coli*. Rectal  
88 swabs were collected and streaked on selective ChromID ESBL agar (bioMérieux,  
89 Marcy l'Etoile, France). Calves were classified as “high-level (HL) ESBL carrier”,  
90 “low-level (LL) ESBL carrier” or “not (NO) ESBL carrier” based on the number of  
91 colonies that grew on the selective medium after 24 hours at 37°C (> 100 colonies=  
92 HL, < 100 colonies= LL, or no colony= NO). In each farm, 15 (five of each HL, LL  
93 and NO status) out of the initially 50 tested calves were selected and included in the  
94 study. Calves were grouped in pens according to their level of ESBL carriage.

### 95 **Sampling and antibiotic data collection**

96 Rectal swabs from each of the 15 calves were collected in duplicate every 15 days  
97 until departure to the slaughterhouse (Fig. 1). Swabs were placed immediately in  
98 portable coolers with ice packs, shipped to the ANSES laboratory in Lyon, France,  
99 and stored at -80°C. Antibiotic treatments were recorded by the three farmers  
100 throughout fattening (Fig. 1, see Supplementary Methods).

#### 101 **Quantification of *bla*<sub>CTX-M</sub> copy number in fecal samples**

102 DNA was extracted from swabs collected 7 days and 21 days after arrival in farms,  
103 and one by month for each calf, as described in (17), using the DNEasy PowerSoil  
104 kit (QIAGEN, Venlo, Netherlands). Quantification of *bla*<sub>CTX-M</sub> group 1 and group 9  
105 gene copies was performed by quantitative PCR (qPCR) as described in (18), using  
106 primers obtained from (19) (see Supplementary Methods). PCR conditions were as  
107 described in (19). Products were detected with a LightCycler® 480 System (Roche,  
108 Bâle, Switzerland).

#### 109 **Selection of ESBL-producing *E. coli* isolates**

110 Upon arrival at ANSES, swabs were plated on selective ChromID ESBL agar for the  
111 detection of ESBL-producing *E. coli*. Samples were classified as ESBL positive if at  
112 least one colony had grown on chromID ESBL agar after incubation at 37°C for 24  
113 hours. One presumptive *E. coli* colony was randomly selected from each selective  
114 chromID ESBL plate and stored at -80°C for further characterization.

#### 115 **Antimicrobial susceptibility testing of ESBL-producing *E. coli* isolates**

116 Antimicrobial susceptibility was tested on all putative ESBL-producing *E. coli* by the  
117 disk diffusion method on Mueller-Hinton agar and interpreted according to the clinical  
118 breakpoints recommended by the Antibiogram Committee of the French Society of

119 Microbiology (see Supplementary Methods). Susceptibility to ten non- $\beta$ -lactam  
120 antibiotics of veterinary and human interests was tested (colistin, tetracycline,  
121 kanamycin, gentamicin, streptomycin, florfenicol, sulfonamides, trimethoprim,  
122 nalidixic acid, and enrofloxacin). Minimum inhibitory concentration (MIC) for colistin  
123 was determined by the broth microdilution method as recommended by the  
124 European Committee on Antimicrobial Susceptibility Testing (EUCAST). For each  
125 ESBL-producing isolate, an antibiotic co-resistance score was computed. It was  
126 defined as the number of antibiotic classes to which the clone was resistant to (in  
127 addition to  $\beta$ -lactamines), among the seven tested (polymyxins, tetracyclines,  
128 aminoglycosides, amphenicols, sulfonamides, diaminopyrimidines, quinolones).

### 129 **Genotypic discrimination of ESBL-producing *E. coli* isolates**

130 Pulsed-field gel electrophoresis (PFGE) was performed on all putative ESBL-  
131 producing *E. coli* isolates using the restriction enzyme *Xba*I. DNA fingerprints were  
132 analyzed and the dendrogram of patterns was made using the Dice correlation  
133 coefficient, with tolerance and optimization set at 0.5% and 1%, respectively  
134 (BioNumerics, Ghent, Belgium). Comparison of PFGE profiles was done among  
135 isolates from the same farm to discriminate between ESBL-producing *E. coli* strains  
136 circulating among calves (see Supplementary Methods). Phylogenetic grouping was  
137 performed using the method described in (20). Detection of *bla*<sub>CTX-M</sub> group 1, *bla*<sub>CTX-M</sub>  
138 group 9, and *mcr-1* gene was done by PCR as described in (9, 21).

### 139 **Whole genome sequencing (WGS) of ESBL-producing *E. coli* isolates**

#### 140 *Selection of E. coli isolates to be sequenced*

141 We sequenced the genome of a subset of isolates (n=43) based on their PFGE  
142 profile. Two isolates were considered different strains if their profiles differed from at

143 least one band. When several isolates had an identical PFGE profile, one isolate  
144 was selected for WGS. Isolates having identical PFGE profiles but a different status  
145 regarding the detection of the *mcr-1* gene compared to their group were additionally  
146 selected for genome sequencing. Genomic DNA was extracted from colonies  
147 growing on LBA using the NucleoMag Tissue kit (Macherey-Nagel, Düren,  
148 Germany). Libraries were prepared using Nextera DNA library prep kit (Illumina, San  
149 Diego, California) and sequenced on an Illumina HiSeq 4000 to produce paired-end  
150 reads of 100 base pairs (bp).

#### 151 *Phylogenetic analyses and clone definitions*

152 MLST (Achtman and Pasteur Institute schemes), serotype and *fimH* gene allele were  
153 determined using SRST2 0.2.0 with standard parameters (22), after an initial quality  
154 check (see Supplementary Methods). Genomes were assembled with SPAdes  
155 3.11.1 with the “careful” option to reduce the number of mismatches and short indels.  
156 The phylogroup was determined with the *in silico* PCR ClermonTyper 1.4 (23, 24). A  
157 core genome was created with ParSNP from Harvest (25–28) and BEDTools (29),  
158 using the *E. coli* strain ED1a genome as a reference.

159 The clone definition was established following the strategy described below. First,  
160 isolates were grouped by their haplogroup, which was defined as a combination of  
161 their sequence types (ST) according to the Achtman scheme and the Pasteur  
162 Institute scheme, their serotype (O:H) and their *fimH* allele. Second, the SNPs  
163 detected in the genes of the core genome were used as a genetic distance between  
164 the isolates within identical haplogroups. Isolates were considered to be part of the  
165 same clone if they had the same phylogroup and haplogroup, and if the number of  
166 SNPs in their core genomes was smaller than 100 SNPs. If two isolates had the

167 same phylogroup and haplogroup but their core genome differed by more than 100  
168 SNPs, they were named ‘clone1’ and ‘clone2’ (see Supplementary Methods, Fig.  
169 S1). An analysis of the number of SNPs among haplogroups was conducted to (1)  
170 confirm the validity of our genotypic markers and to (2) delineate clones (see  
171 Supplementary Methods). For the clarity of the reading, clone names are restricted in  
172 the text by a combination of their ST and serotype, while their full name (‘phylogroup  
173 STs serotype and *fimH* gene allele’) is provided in the figures. The full list and  
174 characteristics of the strains sequenced are presented in Table S1A, along with their  
175 genome accession numbers.

#### 176 *Resistome and virulome analyses*

177 The resistome and virulome of the clones were characterized using the software  
178 Abricate 0.8.1 (see Supplementary Methods) (30).

#### 179 *Classification of clones according to colonization efficiency*

180 In each farm, clones were grouped according to the number of calves in which they  
181 were detected: “inefficient colonizers” when found in 20% of calves or less  
182 (corresponding to three calves or less), “intermediate colonizers” when found  
183 between 20% and 80% of the calves (four to eleven calves), and “efficient  
184 colonizers” when found in 80% of the calves or more (twelve calves or more).

### 185 **Conjugation and plasmid sequencing**

#### 186 *Selection of plasmids to be sequenced*

187 Transfers of plasmids from sequenced isolates into the *E. coli* J53 plasmid-free  
188 strain were conducted to characterize the *bla*<sub>CTX-M</sub> and *mcr-1* carrying plasmids.  
189 Conjugation was performed in liquid medium using rifampicin and cefotaxime



190 (5mg/L) or colistin (2mg/L) to select for transconjugants (TC). Only TCs carrying the  
191 appropriate plasmid were further characterized (see Supplementary Methods).

### 192 *Sequencing and bioinformatics analyses*

193 Libraries were prepared as described above and sequenced on an Illumina HiSeq  
194 4000 to produce paired-end reads of 100 base pairs (bp). Plasmids were identified  
195 by Abricate, using the PlasmidFinder database (30–32). Contigs were sorted  
196 according to their chromosomal or plasmidic location using PlaScope (33). The  
197 transconjugant reads were mapped on the J53 assembly genome using BWA (34).  
198 The unmapped reads were considered as plasmidic and were retrieved with  
199 SAMtools 0.1.18 (35, 36). These reads were assembled with SPAdes and the  
200 assembled genomes were blasted against the MaGe database (37). Contigs that  
201 couldn't be assembled were blasted against the Refseq database (38). The  
202 plasmidic genomes were annotated by RAST (39–41) and the pMLST sequence  
203 types were obtained with pMLST-2.0 Server on the CGE. The SNPs were detected  
204 by SAMtools (35, 36) and bcltools (42).

### 205 *Phylogenetic analyses and plasmid lineage definition*

206 Plasmid classification was established in a two-step strategy. First, sequenced  
207 plasmids were grouped by their incompatibility group, FAB formula for IncF plasmids  
208 or ST for the other plasmids, according to the published nomenclature (43–45).  
209 Second, the presence of distinct lineages was searched within each group of  
210 plasmids. The core genome of a plasmid group was defined as the set of genes  
211 present in the genome of the reference and in all the reconstructed genomes. The  
212 numbers of SNPs detected in the genes of the core genome were used as a genetic  
213 distance to discriminate between plasmid lineages (see Supplementary Methods,

214 Fig. S2). The full list and characteristics of the transconjugants sequenced are  
215 presented in Table S1B, along with their genome accession numbers.

216 *Identification of bla<sub>CTX-M</sub> gene carrying-plasmids and mcr-1 gene carrying-plasmids in*  
217 *the collection of isolates*

218 For all isolates, we looked for the plasmid that was identified in the TC of their clone  
219 as the one carrying the *bla<sub>CTX-M</sub>* gene and/or the *mcr-1* gene (see Supplementary  
220 Methods for a detailed review of the collection). This was performed by replicon  
221 typing (44) using a commercially available kit (Diatheva, Cartoceto, Italy). When  
222 needed, the discriminant allele of the pMLST scheme was sequenced (FII allele in  
223 the FAB formula, *ardA* gene in the IncI1 pMLST scheme, Genewiz, Leipzig,  
224 Germany). Each time the *bla<sub>CTX-M</sub>* carrying plasmid identified in a clone was detected  
225 in its PFGE-related isolates, we hypothesized that the *bla<sub>CTX-M</sub>* gene was carried by  
226 this same plasmid.

## 227 **Statistical analyses**

228 We used the Wilcoxon test to compare the proportion of ESBL-positive calves  
229 between the first and the last sampling. We used linear regression analysis with  
230 1,000 permutations to test the effect of the level of excretion of ESBL-producing *E.*  
231 *coli* at day 7 on the number of positive samples during the fattening (see  
232 Supplementary Methods).

233 We searched for an association between the total number of copies of *bla<sub>CTX-M</sub>*  
234 genes / g of feces estimated by qPCR and the level of excretion of ESBL-producing  
235 *E. coli* (no excretion, low-level, high-level) using Kruskal-Wallis test. This test was  
236 also used to search for an association between the number of copies of *bla<sub>CTX-M</sub>*  
237 genes / g and the farm. Post-hoc Dunn's tests were used for pairwise comparisons  
238 between farms, using the Bonferroni method to correct the p-values.

239 The Spearman correlation test was used to look for an association between the  
240 number of calves colonized by a clone and its period of detection in a farm. It was  
241 also used to look for an association between these two variables and the antibiotic  
242 co-resistance score of each clone. A genome wide association study (GWAS) was  
243 done to search for an association between gene content and the ability for clones to  
244 be efficient colonizers, or to persist for more than a month in a farm (see  
245 Supplementary Methods).

246 Means are presented with standard deviations for continuous variables and  
247 percentages with counts are given for categorical variables. Statistical analyses were  
248 performed using R software (R version 3.6.1) (46). The linear regression with  
249 permutations was done using the function “lmp” from the package lmp (47).  
250 Figures were produced using the package ggplot2 (version 2.2.1) (48).

251

## 252 **Results**

### 253 **Animal inclusion and follow-up**

254 In farm A, the 50 calves screened at day 7 were ESBL positive and 78% (39/50)  
255 were HL carriers. Hence, 15 positive calves were included, of which 11 HL carriers.  
256 In farm B, 60% [45.2; 73.6]<sub>95%</sub> of calves (30/50) were ESBL positive at day 7 so that  
257 ten ESBL positive and five ESBL negative calves were included, as planned. In farm  
258 C, 86% [73.3; 94.2]<sub>95%</sub> of calves (43/50) were ESBL positive. A switch of calf IDs  
259 between LL and NO carrier occurred, which led to the inclusion of 11 ESBL positive  
260 calves (five HL and six LL carriers) and four NO carriers. Calves were present for  
261 161 days on farms A and B and 147 days on farm C (Fig.1). One ESBL negative calf  
262 from farm C died during fattening and was excluded from the study. There was no

263 missing sample for the 44 remaining calves so that downstream analyses were  
264 performed on 514 samples.

### 265 **Excretion of ESBL-producing *E. coli* and of *bla*<sub>CTX-M</sub> genes**

266 There was a significant decrease of ESBL-producing *E. coli* prevalence between the  
267 first and the last samplings, five months later (Wilcoxon test,  $p= 5 \times 10^{-11}$ ). ESBL-  
268 producing *E. coli* were detected in all calves at at least one time point, except for the  
269 five ESBL negative calves in farm B, which remained negative over the whole  
270 fattening period (Fig. 2A). We thus collected 174 ESBL positive samples (33.9% of  
271 the total number of samples), with 84, 15 and 75 positive samples in farms A, B, and  
272 C, respectively (Fig. 2A). Calves had an average of  $5.6 (\pm 1.2)$ ,  $1.0 (\pm 0.9)$  and  $5.4 (\pm$   
273  $1.5)$  positive samples in farms A, B and C, respectively. Calves that were HL, LL or  
274 NO carriers at day 7 had an average of  $4.9 (\pm 2.1)$ ,  $4.1 (\pm 2.3)$  and  $2.0 (\pm 1.4)$   
275 positive samples, respectively. No difference in the number of positive samples was  
276 evidenced between calves with HL or LL excretion at day 7 (linear regression with  
277 1,000 permutations,  $p= 0.08$ , see Supplementary Results). NO carrier calves at day  
278 7 had significantly fewer positive samples than HL and LL carriers at day 7 (linear  
279 regression with 1,000 permutations,  $p= 7 \times 10^{-5}$  and  $p= 0.003$ , respectively).

280 The *bla*<sub>CTX-M</sub> genes were detected in 68 samples among the 307 samples tested by  
281 qPCR (Fig. 2B). The number of colonies on ChromID ESBL agar was associated  
282 with the number of copies of *bla*<sub>CTX-M</sub> / g of feces estimated by qPCR (Kruskal-Wallis  
283 test,  $p < 10^{-15}$ , Table S2). For 73.8% of the samples classified as LL (48/65), the  
284 number of copies of *bla*<sub>CTX-M</sub> / g was below  $10^6$ , while for 89.3% of the samples  
285 classified as HL (50/56), the number of *bla*<sub>CTX-M</sub> / g was above  $10^6$  (Fig. 2B). The  
286 number of copies of *bla*<sub>CTX-M</sub> / g of feces was significantly different between farms  
287 (Kruskal-Wallis test,  $p= 8 \times 10^{-8}$ ), and was significantly higher in farms A and C

288 compared to farm B (Dunn tests, Bonferroni corrected  $p= 2 \times 10^{-7}$  and  $p= 7 \times 10^{-5}$ ,  
289 respectively).

## 290 **Characterization of ESBL-producing *E. coli* isolates**

291 One colony was isolated from the 174 positive samples for further characterization.  
292 In farm C, one isolate was lost (isolated at day 21 from the calf 'C0191'). Thus,  
293 downstream analyses were conducted on 173 isolates. The ESBL-producing *E. coli*  
294 isolates carried either *bla*<sub>CTX-M-1</sub> (112/173 isolates, 64.7%), *bla*<sub>CTX-M-14</sub> (58/173,  
295 33.5%) or *bla*<sub>CTX-M-15</sub> (3/173, 1.8%). All of them were resistant to at least two  
296 antimicrobials other than  $\beta$ -lactams, the most common resistances being against  
297 tetracyclines, sulfonamides, trimethoprim and aminoglycosides (Table S3A).

298 The 173 isolates were grouped in 43 different combinations (Fig. S3A, Fig. S3B, Fig.  
299 S3C). The genome of one representative isolate of each of the 43 combinations was  
300 sequenced (see Supplementary Results). As defined in the material & method  
301 section, 32 *E. coli* clones were discriminated among the 43 isolates sequenced. A  
302 high phylogenetic diversity was observed among ESBL-producing *E. coli* clones, as  
303 clones from all phylogroups except B2 were detected, and one clone had an  
304 unassigned phylogroup ('ST1850/918 O9:H10', Fig. S4A). Of note, the ST58 lineage  
305 from the B1 phylogroup, known as part of the clonal complex 87 (CC87) (49), was  
306 detected in farms B and C, with the isolation of the two clones 'ST58/24 O8:25' and  
307 'ST58/24 O9:H25' (Fig. 3). ESBL-producing *E. coli* clones had a mean co-resistance  
308 score of 4.8 ( $\pm 1.0$ ), the minimum and maximum being two and seven, respectively.

309 ESBL-producing *E. coli* clones carried in average 9.6 ( $\pm 2.5$ ) antibiotic resistance  
310 genes (see Supplementary Results), and genes found in more than 50% of the  
311 clones conferred resistance against penicillins, tetracyclines, aminoglycosides and

312 sulfonamides (Fig. S4C). These genes were *bla*<sub>TEM-1</sub> (27/32 clones, 84.4%), *tet(A)*  
313 (27/32, 84.4%), *aph(6)-Ia* (25/32, 78.1%), *aph(3'')-Ib* (23/32, 71.9%), *sul2* (21/32,  
314 65.6%), *aph(3')-Ia* (20/32, 62.5%), and *sul1* (17/32, 53.1%). Virulence genes  
315 associated with intestinal and extra-intestinal pathogenicity were found in all ESBL-  
316 producing clones (Fig. S5A, Fig. S5B and Fig. S5C). ESBL-producing clones carried  
317 on average 34 ( $\pm$  9) genes associated with extraintestinal virulence and 19 ( $\pm$  14)  
318 genes associated with intestinal virulence (Fig. S5A, Fig. S5B).

319 Three potential intestinal pathogenic clones were found: the clone 'ST301/917  
320 O80:H2' was an enterohemorrhagic (EHEC) / extra-intestinal *E. coli* hybrid  
321 pathotype, first described in (50), harboring the locus of enterocyte effacement (LEE)  
322 with the intimin-encoded *eae- $\xi$*  gene, the *ehxA*, *efa1*, *espP* genes, the *stx2a* and  
323 *stx2b* genes (Fig. S5B). It was also carrying *iss*, *iroN* *hlyF*, *ompT*, four genes  
324 associated with the pS88 plasmid, which is related to avian pathogenic *E. coli*  
325 plasmids (51) (Fig. S5A and Fig. S5B). The clone 'ST329/919 O109:H16' was a  
326 STEC clone (*stx2a* and *stx2b* genes detected, Fig. S5B). The clone 'ST300/591  
327 O182:H25' was an atypical EPEC clone (LEE detected, Fig. S5B).

### 328 **Within-farm dynamics of ESBL clones and plasmids**

329 The *bla*<sub>CTX-M-1</sub> gene was carried by five plasmid types disseminated in 16 clones  
330 (encompassing 112/173 isolates, 64.7%, Fig. 4), while the *bla*<sub>CTX-M-14</sub> gene was  
331 carried by five plasmid types disseminated by 15 clones (encompassing 58/173  
332 isolates, 33.5%, Fig. 5). The *bla*<sub>CTX-M-1</sub> and *bla*<sub>CTX-M-14</sub> genes were carried by distinct  
333 plasmids and clones (see Supplementary Methods for details). Of note, the *bla*<sub>CTX-M-</sub>  
334 <sub>15</sub> gene was detected on the chromosome of the same clone in farms B and C (Fig.  
335 3, Fig. S6A, see Supplementary Results).

336 In farm A, 11 *E. coli* clones were identified. The mean number of clones colonizing a  
337 calf was 3.5 ( $\pm$  0.7). All calves experienced long-term excretion through a succession  
338 of colonizations during the first half of the fattening period (Fig. 3A). Most of these  
339 clones had diffused among the batch of calves, with 63.6% of them (7/11) detected  
340 in several calves. The *bla*<sub>CTX-M-1</sub> gene was predominant and carried by at least two  
341 plasmids in five clones (encompassing 64/84 isolates in this farm, Fig. 4A). The  
342 presence of *bla*<sub>CTX-M-1</sub> gene was mostly due to two efficient colonizers representing  
343 78.1% (50/64) of the isolates carrying this gene and 59.5% (50/84) of all isolates in  
344 this farm. They were widespread among the batch of calves, as more than 80.0%  
345 (12/15) of the calves excreted them (Fig. 3A).

346 In farm B, 11 *E. coli* clones were identified and the mean number of clones  
347 colonizing a calf was 1.3 ( $\pm$  0.5). Calves experienced a short-term excretion, which  
348 ended after 49 days (Fig 3B). All *E. coli* clones were inefficient colonizers. The  
349 *bla*<sub>CTX-M-1</sub> gene was predominant (12/15 isolates) and spread by Inc11/ST3 lineage 1  
350 and Inc11/ST312 plasmids distributed in five and three clones, respectively (Fig. 4B).  
351 The *bla*<sub>CTX-M-14</sub> gene was detected once in two calves that had distinct clones, but  
352 which had the same *bla*<sub>CTX-M-14</sub>-carrying IncF/F2:A-:B- plasmid (Fig. 5B). In this farm,  
353 a higher level of plasmid diffusion than *E. coli* clone diffusion among calves  
354 explained the presence of *bla*<sub>CTX-M</sub> genes.

355 In farm C, 14 *E. coli* clones were identified and the mean number of clones  
356 colonizing a calf was 3.6 ( $\pm$  1.0). Calves experienced an unsteady excretion,  
357 characterized by a succession of ESBL clone colonizations until the end of the  
358 fattening period (Fig. 3C). Only 28.6% (4/14) of clones were found in several calves.  
359 From the second month until the end, calves were successively colonized by only  
360 three *E. coli* clones: 'ST744/2 O101:H9' detected from day 35 to day 106,

361 'ST300/591 O182:H25' from day 91 to day 147, and 'ST329/919 O109:H16' from day  
362 119 to day 147 (Fig. 3C). The *bla*<sub>CTX-M-1</sub> and *bla*<sub>CTX-M-14</sub> genes were both detected in  
363 36 isolates. The presence of *bla*<sub>CTX-M-1</sub> and *bla*<sub>CTX-M-14</sub> genes was mostly due to two  
364 *E. coli* clones found in 100% (14/14) and 93.8% (13/14) of the calves, respectively  
365 (Fig. 3C, see Supplementary Results). These two efficient colonizers each carried  
366 different plasmids that were themselves not efficient spreaders, as no other *E. coli*  
367 clone in this farm carried these plasmids (Fig. 4C, Fig. 5C).

### 368 **Between-farm dynamics of ESBL clones and plasmids**

369 Most *E. coli* clones were found only in one farm, except for five clones ('ST10/2  
370 O101:H9 clone2', 'ST167/2 O101:H9', 'ST301/917 O80:H2' 'ST58/24 O9:H25', and  
371 'ST57/533 O119:H10', Fig. 6, Fig. S4A). These five clones had been isolated one or  
372 two times in no more than three calves in each farm (Fig. 6). Hence, although  
373 detected in several farms, these clones were inefficient colonizers in all of them.

374 Four ESBL plasmids were identified in several farms: IncI1/ST312 in farms A and B,  
375 IncK in farms A and C, IncF/F2:A-B- in all three farms, and IncF/F2:A-B42 in farms  
376 A and C (Fig. 4, Fig. 5). IncF/F2:A-B42 plasmid was spread by the same *E. coli*  
377 clone in different farms ('ST57/533 O119:H10', Fig. 5). The other plasmids were  
378 carried by distinct *E. coli* clones in the different farms. While present in two farms,  
379 IncK and IncF/F2:A-B42 plasmids were detected only in one clone per farm,  
380 suggesting a limited spread (Fig. 5). On the opposite, IncI1/ST312 and IncF/F2:A-B-  
381 have spread in several clones in each farm. The IncI1/ST312 plasmid has spread in  
382 a few clones, and notably met the efficient colonizer 'ST1850/918 O9:H10' in farm A  
383 (Fig. 4A). IncF/F2:A-B- was present in the three farms and has spread in at least  
384 two *E. coli* clones in each of them (Fig. 5). In farm C, it has spread in six clones,  
385 suggesting higher efficiency to disseminate compared to the other plasmids.



## 386 **Persistence of ESBL clones over the fattening period**

387 The length of the period of detection was significantly associated with the number of  
388 calves in which ESBL-positive bacterial clones were detected (Spearman's  
389 correlation,  $p = 4 \times 10^{-9}$ ). The correlation coefficient was equal to 0.85, indicating a  
390 strong positive association between the diffusion of ESBL clones among a batch of  
391 calves and their persistence in the farm during fattening. No significant association  
392 was found between the antibiotic co-resistance score of the ESBL clones and their  
393 diffusion among a batch of calves, nor with their persistence in the farms. No  
394 significant association was found between the genome content of the ESBL clones  
395 and their diffusion among a batch of calves, nor with their persistence in the farms  
396 (GWAS analyses, Bonferroni-corrected  $p > 0.05$ ).

## 397 **Distribution of the *mcr-1* gene in bacterial clones and plasmids**

398 The *mcr-1* gene was present in nine clones, eight of which in farm A and one in farm  
399 C (encompassing 53 isolates in total, Fig. 7). Calves from farm A received early  
400 colistin treatment and were the only ones exposed to colistin during the fattening  
401 period (Fig. 1). Plasmids carrying the *mcr-1* gene found in transconjugants were  
402 IncX4 and IncHI2 plasmids (Fig. 7). The *mcr-1*-carrying-IncX4 plasmid disseminated  
403 in three clones and was present in 73% of the *mcr-1*-positive isolates in farm A. Of  
404 note, a chromosomal insertion of the *mcr-1* gene was found in two isolates, one from  
405 farm A and one from farm C (Fig. S6A and S6A, see Supplementary Results).

406

## 407 **DISCUSSION**

### 408 *Dynamics of ESBL prevalence in calves*

409 In accordance with previous studies (9, 12), a decrease in ESBL prevalence in  
410 calves was observed over the fattening period, although each farm displayed a

411 specific dynamic scheme (Fig. 2). Differences in ESBL dynamics among farms may  
412 be attributed to local factors, such as intercurrent diseases justifying antibiotic  
413 treatment. All ESBL positive clones were resistant to several antibiotics commonly  
414 used in the veal industry (9, 52–54) (Table S3A, Fig. S4C). Additionally, in farm A,  
415 the early exposure to colistin likely selected ESBL positive clones co-harboring the  
416 *mcr-1* gene. Of note, whereas ESBL positive clones are usually present in the  
417 subdominant flora (6, 9), the opposite situation may have happened in farm A during  
418 the first 10 days, reflecting a massive abundance of ESBL positive clones  
419 concomitant with ongoing colistin treatment (Fig.1, Fig. 2). Furthermore, in  
420 accordance with a previous study, (9) while the prevalence of ESBL-producing *E.*  
421 *coli* decreased over time (Fig. 2), it has been shown that non ESBL-producing *E. coli*  
422 remained at high levels (6, 9). These data suggest that, in the absence of ESC  
423 treatment in the three farms (Fig.1), maintaining a *bla*<sub>CTX-M</sub>-carrying plasmid could  
424 have entailed a cost to the ESBL-producing clones. Such cost, caused by plasmid  
425 replication and the expression of plasmid-borne genes (55–57), could alter bacterial  
426 host metabolic gene expression, ultimately impairing their ability to maintain a  
427 competitive growth rate in an environment with limited resources (58, 59).

428 Loss of *bla*<sub>CTX-M</sub> carrying plasmid may have happened during our study, but as we  
429 focused only on *E. coli* clones displaying a phenotype of ESBL production, we  
430 cannot estimate the magnitude of such loss rate. Studies showed that spontaneous  
431 loss happens rarely *in vivo*, even when ESBL-producing strains compete with  
432 plasmid-free strains, as shown in pigs, rabbits and lambs (60–63). A modulation of  
433 the cost by a selective switch off of horizontally acquired gene expression (64, 65)  
434 could also explain why no association was found between genes and the ability for a  
435 clone to colonize many calves nor to persist in farms.

436 *Long-term carriage is associated with recurrent colonizations by ESBL-producing E.*  
437 *coli clones*

438 We showed that *bla*<sub>CTX-M</sub> gene-long-term carriage was characterized by successive  
439 detections of distinct ESBL clones in calves (Fig. 3), which highlights that ESBL  
440 carriage in veal farms is a highly dynamic process. These data extend similar  
441 observations from our group and others on ESBL clones colonizing the human  
442 microbiota, for instance where multiple transient colonizations by up to seven *E. coli*  
443 clones was also found to drive the intestinal carriage of *bla*<sub>CTX-M</sub> genes over a 22-  
444 days period (66) in humans visiting high-risk areas for acquiring ESBL-producers  
445 (67). Such similar data on intestinal dynamics in ESBL colonization is noticeable  
446 considering the differences in gut microbiota composition between humans and  
447 cattle at inter-species level (68–70) and intra-species level (71, 72). Moreover,  
448 phylogroups B1, E and A, very common in cattle (71–73), accounted for a large  
449 proportion of the ESBL clones that proved very diverse, suggesting multiple  
450 acquisition events of *bla*<sub>CTX-M</sub> genes. Of note, phylogroup B2, predominant in human  
451 and companion animal's commensal populations (72, 74) but minor in cow's  
452 populations (71), was the only phylogroup not detected. In humans, ESBL clones of  
453 phylogroups B2, D and F rather than A, B1 and E persisted longer in travelers  
454 returning from tropical regions (Armand-Lefevre *et al.*, Microbial Genomics, in press).  
455 Similarly, here in calves, alongside acquisition events, the successful spread of  
456 ESBL genes in gut microbiomes is fostered by chronic recurrent intestinal  
457 colonization by non-B2 bacterial hosts, *i.e.* that are well-adapted to the bovine host.  
458 Moreover, we found that the number of copies of *bla*<sub>CTX-M</sub> / g of feces was  
459 significantly higher in farms A and C compared to farm B (Fig. 2), suggesting that

460 ESBL producers' abundance at start could help predict the persistence of ESBL  
461 producers' carriage, as it was shown in travelers (67).

462 *Efficient bla<sub>CTX-M</sub> spread is supported by a few E. coli clones*

463 In two farms, we found a high-level diffusion of four efficient colonizing clones (Fig.  
464 6). Their greater ability to disseminate within calves and to persist over time could be  
465 attributable to enhanced survival characteristics in the calves' environment, since *E.*  
466 *coli* is a facultative anaerobic bacterial species which can survive in other habitats  
467 than gastrointestinal tracts (72). Once released into the pen, ESBL-producing *E. coli*  
468 could be selected on the basis of their ability to implement stress-tolerance  
469 mechanisms, which ultimately would result in a subset of clones able to orally re-  
470 infect calves. Such mechanisms have been shown to enhance survival in the  
471 environment, like a stress-induced mutagenesis mediated by *rpoS* gene (75), a  
472 strong ability to produce biofilms (76, 77), and a capacity to grow at temperatures  
473 below their optimum (78, 79). Hence, these efficient colonizing clones may have  
474 circumvented the potential fitness cost exerted by their *bla<sub>CTX-M</sub>*-carrying plasmid by  
475 epistatic interactions between their plasmids and chromosomes. The magnitude of  
476 the fitness cost of an antibiotic-resistant carrying plasmid depends on the host  
477 genetic background, the plasmid backbone and its gene content, as shown both *in*  
478 *vitro* and *in vivo* (62, 80–82). Studying bacterial host-conjugative plasmid  
479 combinations, Silva and colleagues showed that after a period of coevolution,  
480 compensatory mutations in antibiotic resistance determinants could arise either on  
481 the chromosome or on the plasmid, or both (83). Ultimately, the plasmid-carrying  
482 host became fitter than its plasmid-free derivative in 32% of the tested combinations  
483 (83). Hence, the antibiotic treatments received by calves may have fostered some  
484 ESBL clones at the expense of others, via selection and epistasis compensating

485 *bla*<sub>CTX-M</sub>-carrying plasmid fitness cost. This is in accordance with the successful  
486 spread of the clone 'ST10/466 O8:H32' (Fig. 6), in which the *mcr-1* gene stably  
487 persisted (Fig. 7). Of note, other factors could have also affected the fitness cost of  
488 the plasmids, such as the presence of other plasmids in the bacterial host (83, 84),  
489 and the animal host species (63).

#### 490 *Plasmid spread in E. coli clones also drive bla*<sub>CTX-M</sub> *dissemination*

491 Another striking result was the ability for some *bla*<sub>CTX-M</sub>-carrying plasmids to spread  
492 widely, such as IncI1/ST312 and IncF/F2:A-B- (Fig. 4, Fig. 5). Spread of *bla*<sub>CTX-M</sub>-  
493 carrying plasmid among commensal *E. coli* populations had already been observed  
494 in orally inoculated piglets with an *E. coli* strain carrying *bla*<sub>CTX-M-1</sub> gene (61). It has  
495 been shown both *in vitro* and *in vivo* in mice that conjugation frequencies vary across  
496 plasmid, donor, and recipient combinations (85). Studies in *Salmonella* have  
497 reported the implication of epistatic interactions between the chromosome and  
498 plasmids in the spread of the latter in new hosts, involving two-sided active  
499 mechanisms (64, 65). Antibiotic treatments may also impact plasmid transfer rates,  
500 which is compatible with our observations on *mcr-1*-carrying IncX4 plasmid diffusion  
501 in farm A, in which colistin was used (Fig.1, Fig. 7).

502 Of note, two clones from the CC87, hosting IncI1/ST312 and IncI1/ST3 lineage1  
503 plasmids were detected among the ESBL clones (Fig. S4A). This clonal complex is  
504 known to be highly fitted for animal gut environments, enriched in antimicrobial  
505 resistance genes and to have a high capacity to acquire and disseminate these  
506 genes through conjugation to other members of microbial communities (49). This is  
507 in accordance with our findings, as their *bla*<sub>CTX-M</sub>-carrying plasmids were found in  
508 several other clones of farm B (Fig. 4). The carriage of *bla*<sub>CTX-M</sub>-carrying plasmids by

509 members of CC87 highlights the implication of clones prone to amplify the  
510 dissemination of *bla*<sub>CTX-M</sub> in veal calf gut microbial communities.

511 The presence of *bla*<sub>CTX-M</sub> genes in farm B was mainly driven by plasmid diffusion  
512 rather than clonal diffusion. Such gene dynamics observed only in the farm in which  
513 no antibiotic treatment was given at start (Fig. 1) may suggest that antibiotic  
514 treatment promotes *bla*<sub>CTX-M</sub> genes persistence by enhancing clone diffusion over  
515 plasmid diffusion.

516 *Multi-farm spreaders were found at low level in each farm*

517 Interestingly, ESBL clones found in several farms were poor colonizers at individual  
518 level (Fig. 6), highlighting that even rare ESBL clones in a given ecosystem may  
519 encounter an epidemiological success at a macro-level. One of them was of the  
520 sequence type ST57, which was also detected in Dutch veal farms (12). In these  
521 farms, ST57 was responsible for a bloom of *bla*<sub>CTX-M-14</sub> spread by an IncF/F2:A-B-  
522 plasmid. The ST57 *E. coli* clone detected in our study also carried *bla*<sub>CTX-M-14</sub>, but on  
523 a IncF/F2:A-B42 plasmid in both farms A and C (Fig. 5). The ST167 was also  
524 detected in French farm settings and found prevalent among ESBL-producing *E. coli*  
525 isolates (86). It was carrying a *bla*<sub>CTX-M-1</sub> gene on a IncI1/ST3 plasmid, like in our  
526 study. Taken together, these findings show that the local fitness of an ESBL-  
527 producing *E. coli* clone cannot be predicted from their dynamics in one farm.

528 The multi-farm spreader clone 'ST301/917 O80:H2' was previously described as  
529 an emerging virulent pathotype responsible for hemolytic uremic syndrome and  
530 septicemia in humans (50). The serotype O80:H2 carrying the intimin-encoded *eae*- $\xi$   
531 gene was also detected as an emerging pathotype causing diarrhea since 2009 in  
532 Belgium calves (87). Although we did not focus our work on pathogenic strains, the  
533 presence of this ESBL-producing *E. coli* clone combining pathogenic expression and

534 a phenotype of resistance to last resort antibiotics should be monitored in animals  
535 and farmers.

### 536 *Limitation of the study*

537 Our study had some limitations. First, it is an observational study conducted in  
538 commercial veal farms, which prevent us from drawing conclusions implying  
539 causality, specifically regarding the impact of antibiotic treatments administered.  
540 Second, samplings started seven days after calves arrived in farms, so that the initial  
541 ESBL status of animals remains unknown. Nevertheless, it has been shown that  
542 fecal shedding of ESBL-producing *E. coli* clones is high for calves born in dairy  
543 farms, from which veal calves originate (88). Moreover, since the vast majority of the  
544 300-350 animals entering a farm are coming from different locations across the  
545 French territory, the pool of ESBL-producing *E. coli* clones and plasmids at start is  
546 most likely highly diverse. Third, we have sequenced a subset of all the ESBL-  
547 producing isolates and obtained a subset of plasmids sequenced after conjugation,  
548 limiting our ability to explore more accurately the diversity of ESBL-producing *E. coli*  
549 carriage.

550

551 In conclusion, we showed that the diffusion of ESBL-encoding genes in calves is a  
552 combination of two scenarios encompassing bacterial clone and/or plasmid spread,  
553 which highly rely on local features and contexts. In farms where long-term carriage of  
554 *bla*<sub>CTX-M</sub> genes was observed, specific associations between the resistance gene, the  
555 plasmid type and the bacterial clone were evidenced. These results argue for  
556 complex epistatic interactions between the three parameters, with molecular  
557 mechanisms that need to be further understood in the fight against antibiotic  
558 resistance.

559 **DECLARATIONS**

560 **Acknowledgements**

561 We thank Catherine Branger and Luce Landraud for providing strains for qPCR CTX-  
562 M, and Caroline Wybraniec for her technical assistance.

563 **Conflict of interest**

564 The authors declare that they have no competing interests.

565 **Ethics approval and consent to participate**

566 This study was declared to the CNIL, the French office responsible for protecting  
567 personal data, supporting innovation, and preserving individual liberties. No further  
568 ethical approval for the use of animals in research was needed since this study did  
569 not involve any experimentation on animals (only rectal swabs were sampled) and  
570 since we did not collect and register any personal opinion of the participants.

571 **Data availability**

572 The data for this study have been deposited in the European Nucleotide Archive  
573 (ENA) at EMBL-EBI under accession number PRJEB44471  
574 (<https://www.ebi.ac.uk/ena/browser/view/PRJEB44471>). Raw sequence data are  
575 available in the European Nucleotide Archive (EMBL-EMI) (<http://www.ebi.ac.uk/ena>)  
576 under sample accession numbers ERS6288704 to ERS6288746 for isolates  
577 sequenced and accession numbers ERS6301044 to ERS6301079 for the  
578 transconjugants. The full list and characteristics of these strains are presented in  
579 Table S1A and Table S1B along with their genome accession numbers.

580 **Funding**

581 This work was supported in part by grants from La Fondation pour la Recherche  
582 Médicale to M.M. (grant number FDM20150633309) and E.D. (équipe FRM 2016,



583 grant number DEQ20161136698), and from the European Union's Horizon 2020  
584 Research and Innovation Program under Grant Agreement No. 773830 (Project  
585 ARDIG, EJP One Health) and INTERBEV (Protocol N° SECU-15-31). The funding  
586 organizations were not involved in the study design, or collection, analysis, or  
587 interpretation of the data, or writing of the manuscript.

## 588 **Authors' contributions**

589 MH, JYM, and ED conceived and designed the study. MH and JYM collected the  
590 samples. MH and OC performed the laboratory assays and BC carried out the  
591 bioinformatics analyses. MM carried out the statistical analyses of the data and  
592 generated the figures. MH and MM wrote the manuscript. MH, JYM, and ED revised  
593 and edited the draft. All authors read and approved the final manuscript.

594

## 595 **References**

- 596 1. Carattoli A. 2008. Animal reservoirs for extended spectrum  $\beta$ -lactamase  
597 producers. *Clin Microbiol Infect* 14:117–123.
- 598 2. Meunier D, Jouy E, Lazizzera C, Kobisch M, Madec J-Y. 2006. CTX-M-1- and  
599 CTX-M-15-type  $\beta$ -lactamases in clinical *Escherichia coli* isolates recovered from  
600 food-producing animals in France. *Int J Antimicrob Agents* 28:402–407.
- 601 3. Madec J-Y, Lazizzera C, Châtre P, Meunier D, Martin S, Lepage G, Ménard M-  
602 F, Lebreton P, Rambaud T. 2008. Prevalence of fecal carriage of acquired  
603 expanded-spectrum cephalosporin resistance in *Enterobacteriaceae* strains  
604 from cattle in France. *J Clin Microbiol* 46:1566–1567.

- 605 4. Geser N, Stephan R, Hächler H. 2012. Occurrence and characteristics of  
606 extended-spectrum  $\beta$ -lactamase (ESBL) producing *Enterobacteriaceae* in food  
607 producing animals, minced meat and raw milk. BMC Vet Res 8:21.
- 608 5. Hordijk J, Wagenaar JA, Kant A, van Essen-Zandbergen A, Dierikx C, Veldman  
609 K, Wit B, Mevius D. 2013. Cross-sectional study on prevalence and molecular  
610 characteristics of plasmid mediated ESBL/AmpC-producing *Escherichia coli*  
611 isolated from veal calves at slaughter. PloS One 8:e65681.
- 612 6. Haenni M, Châtre P, Métayer V, Bour M, Signol E, Madec J-Y, Gay E. 2014.  
613 Comparative prevalence and characterization of ESBL-producing  
614 *Enterobacteriaceae* in dominant versus subdominant enteric flora in veal calves  
615 at slaughterhouse, France. Vet Microbiol 171:321–327.
- 616 7. Ceccarelli D, Kant A, van Essen-Zandbergen A, Dierikx C, Hordijk J, Wit B,  
617 Mevius DJ, Veldman KT. 2019. Diversity of plasmids and genes encoding  
618 resistance to extended spectrum cephalosporins in commensal *Escherichia coli*  
619 from Dutch livestock in 2007–2017. Front Microbiol 10.
- 620 8. Hordijk J, Fischer EAJ, van Werven T, Sietsma S, Van Gompel L, Timmerman  
621 AJ, Spaninks MP, Heederik DJJ, Nielen M, Wagenaar JA, Stegeman A. 2019.  
622 Dynamics of faecal shedding of ESBL- or AmpC-producing *Escherichia coli* on  
623 dairy farms. J Antimicrob Chemother 74:1531–1538.
- 624 9. Gay E, Bour M, Cazeau G, Jarrige N, Martineau C, Madec J-Y, Haenni M. 2019.  
625 Antimicrobial usages and antimicrobial resistance in commensal *Escherichia*  
626 *coli* from veal calves in France: evolution during the fattening process. Front  
627 Microbiol 10.

- 628 10. Haenni M, Poirel L, Kieffer N, Châtre P, Saras E, Métayer V, Dumoulin R,  
629 Nordmann P, Madec J-Y. 2016. Co-occurrence of extended spectrum  $\beta$   
630 lactamase and MCR-1 encoding genes on plasmids. *Lancet Infect Dis* 16:281–  
631 282.
- 632 11. Haenni M, Métayer V, Gay E, Madec J-Y. 2016. Increasing trends in *mcr-1*  
633 prevalence among extended-spectrum- $\beta$ -Lactamase-producing *Escherichia coli*  
634 isolates from French calves despite decreasing exposure to colistin. *Antimicrob*  
635 *Agents Chemother* 60:6433–6434.
- 636 12. Hordijk J, Mevius DJ, Kant A, Bos MEH, Graveland H, Bosman AB, Hartskeerl  
637 CM, Heederik DJJ, Wagenaar JA. 2013. Within-farm dynamics of ESBL/AmpC-  
638 producing *Escherichia coli* in veal calves: a longitudinal approach. *J Antimicrob*  
639 *Chemother* 68:2468–2476.
- 640 13. Jarrige N, Cazeau G, Morignat E, Chanteperdrix M, Gay E. 2017. Quantitative  
641 and qualitative analysis of antimicrobial usage in white veal calves in France.  
642 *Prev Vet Med* 144:158–166.
- 643 14. Pardon B, Catry B, Dewulf J, Persoons D, Hostens M, De Bleecker K, Deprez P.  
644 2012. Prospective study on quantitative and qualitative antimicrobial and anti-  
645 inflammatory drug use in white veal calves. *J Antimicrob Chemother* 67:1027–  
646 1038.
- 647 15. Carlet J. 2012. The gut is the epicentre of antibiotic resistance. *Antimicrob*  
648 *Resist Infect Control* 1:39.

- 649 16. Hernando-Amado S, Coque TM, Baquero F, Martínez JL. 2019. Defining and  
650 combating antibiotic resistance from One Health and Global Health  
651 perspectives. *Nat Microbiol* 4:1432–1442.
- 652 17. Massot M, Haenni M, Nguyen TT, Madec J-Y, Mentré F, Denamur E. 2020.  
653 Temporal dynamics of the fecal microbiota in veal calves in a 6-month field trial.  
654 *Anim Microbiome* 2:32.
- 655 18. Smati M, Clermont O, Gal FL, Schichmanoff O, Jauréguy F, Eddi A, Denamur E,  
656 Picard B, Group for the C. 2013. Real-Time PCR for quantitative analysis of  
657 human commensal *Escherichia coli* populations reveals a high frequency of  
658 subdominant phylogroups. *Appl Environ Microbiol* 79:5005–5012.
- 659 19. Ellem J, Partridge SR, Iredell JR. 2011. Efficient direct extended-spectrum  $\beta$ -  
660 Lactamase detection by multiplex real-time PCR: accurate assignment of  
661 phenotype by use of a limited set of genetic markers. *J Clin Microbiol* 49:3074–  
662 3077.
- 663 20. Doumith M, Day MJ, Hope R, Wain J, Woodford N. 2012. Improved multiplex  
664 PCR strategy for rapid assignment of the four major *Escherichia coli*  
665 phylogenetic groups. *J Clin Microbiol* 50:3108–3110.
- 666 21. Shibata N, Kurokawa H, Doi Y, Yagi T, Yamane K, Wachino J, Suzuki S, Kimura  
667 K, Ishikawa S, Kato H, Ozawa Y, Shibayama K, Kai K, Konda T, Arakawa Y.  
668 2006. PCR classification of CTX-M-type  $\beta$ -lactamase genes identified in  
669 clinically isolated gram-negative bacilli in Japan. *Antimicrob Agents Chemother*  
670 50:791–795.

- 671 22. Inouye M, Dashnow H, Raven L-A, Schultz MB, Pope BJ, Tomita T, Zobel J,  
672 Holt KE. 2014. SRST2: Rapid genomic surveillance for public health and  
673 hospital microbiology labs. *Genome Med* 6:90.
- 674 23. Beghain J, Bridier-Nahmias A, Le Nagard H, Denamur E, Clermont O. 2018.  
675 ClermonTyping: an easy-to-use and accurate *in silico* method for *Escherichia*  
676 genus strain phylotyping. *Microb Genomics* 4.
- 677 24. Clermont O, Dixit OVA, Vangchhia B, Condamine B, Dion S, Bridier-Nahmias A,  
678 Denamur E, Gordon D. 2019. Characterization and rapid identification of  
679 phylogroup G in *Escherichia coli*, a lineage with high virulence and antibiotic  
680 resistance potential. *Environ Microbiol* 21:3107–3117.
- 681 25. Treangen TJ, Ondov BD, Koren S, Phillippy AM. 2014. The Harvest suite for  
682 rapid core-genome alignment and visualization of thousands of intraspecific  
683 microbial genomes. *Genome Biol* 15:524.
- 684 26. Edgar RC. 2004. MUSCLE: multiple sequence alignment with high accuracy  
685 and high throughput. *Nucleic Acids Res* 32:1792–1797.
- 686 27. Bruen TC, Philippe H, Bryant D. 2006. A simple and robust statistical test for  
687 detecting the presence of recombination. *Genetics* 172:2665–2681.
- 688 28. Price MN, Dehal PS, Arkin AP. 2010. FastTree 2 – approximately maximum-  
689 likelihood trees for large alignments. *Plos One* 5:e9490.
- 690 29. Quinlan AR, Hall IM. 2010. BEDTools: a flexible suite of utilities for comparing  
691 genomic features. *Bioinformatics* 26:841–842.
- 692 30. Seemann. Abricate.

- 693 31. Zankari E, Hasman H, Cosentino S, Vestergaard M, Rasmussen S, Lund O,  
694 Aarestrup FM, Larsen MV. 2012. Identification of acquired antimicrobial  
695 resistance genes. *J Antimicrob Chemother* 67:2640–2644.
- 696 32. Carattoli A, Zankari E, García-Fernández A, Voldby Larsen M, Lund O, Villa L,  
697 Møller Aarestrup F, Hasman H. 2014. *In silico* detection and typing of plasmids  
698 using PlasmidFinder and plasmid multilocus sequence typing. *Antimicrob*  
699 *Agents Chemother* 58:3895–3903.
- 700 33. Royer G, Decousser JW, Branger C, Dubois M, Médigue C, Denamur E,  
701 Vallenet D. 2018. PlaScope: a targeted approach to assess the plasmidome  
702 from genome assemblies at the species level. *Microb Genomics* 4.
- 703 34. Li H, Durbin R. 2009. Fast and accurate short read alignment with Burrows-  
704 Wheeler transform. *Bioinforma Oxf Engl* 25:1754–1760.
- 705 35. Danecek P, Auton A, Abecasis G, Albers CA, Banks E, DePristo MA,  
706 Handsaker RE, Lunter G, Marth GT, Sherry ST, McVean G, Durbin R, 1000  
707 Genomes Project Analysis Group. 2011. The variant call format and VCFtools.  
708 *Bioinforma Oxf Engl* 27:2156–2158.
- 709 36. Li H, Handsaker B, Wysoker A, Fennell T, Ruan J, Homer N, Marth G, Abecasis  
710 G, Durbin R, 1000 Genome Project Data Processing Subgroup. 2009. The  
711 sequence alignment/map format and SAMtools. *Bioinforma Oxf Engl* 25:2078–  
712 2079.
- 713 37. Vallenet D, Labarre L, Rouy Z, Barbe V, Bocs S, Cruveiller S, Lajus A, Pascal  
714 G, Scarpelli C, Médigue C. 2006. MaGe: a microbial genome annotation system  
715 supported by synteny results. *Nucleic Acids Res* 34:53–65.

- 716 38. O'Leary NA, Wright MW, Brister JR, Ciufu S, Haddad D, McVeigh R, Rajput B,  
717 Robbertse B, Smith-White B, Ako-Adjei D, Astashyn A, Badretdin A, Bao Y,  
718 Blinkova O, Brover V, Chetvernin V, Choi J, Cox E, Ermolaeva O, Farrell CM,  
719 Goldfarb T, Gupta T, Haft D, Hatcher E, Hlavina W, Joardar VS, Kodali VK, Li  
720 W, Maglott D, Masterson P, McGarvey KM, Murphy MR, O'Neill K, Pujar S,  
721 Rangwala SH, Rausch D, Riddick LD, Schoch C, Shkeda A, Storz SS, Sun H,  
722 Thibaud-Nissen F, Tolstoy I, Tully RE, Vatsan AR, Wallin C, Webb D, Wu W,  
723 Landrum MJ, Kimchi A, Tatusova T, DiCuccio M, Kitts P, Murphy TD, Pruitt KD.  
724 2016. Reference sequence (RefSeq) database at NCBI: current status,  
725 taxonomic expansion, and functional annotation. *Nucleic Acids Res* 44:D733-  
726 745.
- 727 39. Aziz RK, Bartels D, Best AA, DeJongh M, Disz T, Edwards RA, Formsma K,  
728 Gerdes S, Glass EM, Kubal M, Meyer F, Olsen GJ, Olson R, Osterman AL,  
729 Overbeek RA, McNeil LK, Paarmann D, Paczian T, Parrello B, Pusch GD, Reich  
730 C, Stevens R, Vassieva O, Vonstein V, Wilke A, Zagnitko O. 2008. The RAST  
731 Server: rapid annotations using subsystems technology. *BMC Genomics* 9:75.
- 732 40. Overbeek R, Olson R, Pusch GD, Olsen GJ, Davis JJ, Disz T, Edwards RA,  
733 Gerdes S, Parrello B, Shukla M, Vonstein V, Wattam AR, Xia F, Stevens R.  
734 2014. The SEED and the rapid annotation of microbial genomes using  
735 subsystems technology (RAST). *Nucleic Acids Res* 42:D206-214.
- 736 41. Brettin T, Davis JJ, Disz T, Edwards RA, Gerdes S, Olsen GJ, Olson R,  
737 Overbeek R, Parrello B, Pusch GD, Shukla M, Thomason JA, Stevens R,  
738 Vonstein V, Wattam AR, Xia F. 2015. RASTtk: a modular and extensible

- 739 implementation of the RAST algorithm for building custom annotation pipelines  
740 and annotating batches of genomes. *Sci Rep* 5:8365.
- 741 42. Li H. 2011. A statistical framework for SNP calling, mutation discovery,  
742 association mapping and population genetical parameter estimation from  
743 sequencing data. *Bioinforma Oxf Engl* 27:2987–2993.
- 744 43. Novick RP. 1987. Plasmid incompatibility. *Microbiol Rev* 51:381–395.
- 745 44. Carattoli A, Bertini A, Villa L, Falbo V, Hopkins KL, Threlfall EJ. 2005.  
746 Identification of plasmids by PCR-based replicon typing. *J Microbiol Methods*  
747 63:219–228.
- 748 45. Carattoli A, Hasman H. 2020. PlasmidFinder and *in silico* pMLST: identification  
749 and typing of plasmid replicons in Whole-Genome Sequencing (WGS). *Methods*  
750 *Mol Biol* 2075:285–294.
- 751 46. R core team. 2019. R: A language and environment for statistical computing. R  
752 Foundation for Statistical Computing, Vienna, Austria.
- 753 47. Wheeler B, Torchiano M. 2016. ImPerm: Permutation Tests for Linear Models.
- 754 48. Wickham H, Chang W, Henry L, Pedersen TL, Takahashi K, Wilke C, Woo K,  
755 Yutani H, Dunnington D, RStudio. 2020. ggplot2: create elegant data  
756 visualisations using the grammar of graphics.
- 757 49. Skurnik D, Clermont O, Guillard T, Launay A, Danilchanka O, Pons S, Diancourt  
758 L, Lebreton F, Kadlec K, Roux D, Jiang D, Dion S, Aschard H, Denamur M,  
759 Cywes-Bentley C, Schwarz S, Tenailon O, Andremont A, Picard B, Mekalanos



- 760 J, Brisse S, Denamur E. 2016. Emergence of antimicrobial-resistant *Escherichia*  
761 *coli* of animal origin spreading in humans. *Mol Biol Evol* 33:898–914.
- 762 50. Soysal N, Mariani-Kurkdjian P, Smail Y, Liguori S, Gouali M, Loukiadis E, Fach  
763 P, Bruyand M, Blanco J, Bidet P, Bonacorsi S. 2016. Enterohemorrhagic  
764 *Escherichia coli* hybrid pathotype O80:H2 as a new therapeutic challenge.  
765 *Emerg Infect Dis* 22:1604–1612.
- 766 51. Peigne C, Bidet P, Mahjoub-Messai F, Plainvert C, Barbe V, Médigue C, Frapy  
767 E, Nassif X, Denamur E, Bingen E, Bonacorsi S. 2009. The plasmid of  
768 *Escherichia coli* strain S88 (O45:K1:H7) that causes neonatal meningitis is  
769 closely related to avian pathogenic *E. coli* plasmids and is associated with high-  
770 level bacteremia in a neonatal rat meningitis model. *Infect Immun* 77:2272–  
771 2284.
- 772 52. Bosman AB, Wagenaar JA, Stegeman JA, Vernooij JCM, Mevius DJ. 2014.  
773 Antimicrobial resistance in commensal *Escherichia coli* in veal calves is  
774 associated with antimicrobial drug use. *Epidemiol Infect* 142:1893–1904.
- 775 53. Callens B, Cargnel M, Sarrazin S, Dewulf J, Hoet B, Vermeersch K, Wattiau P,  
776 Welby S. 2018. Associations between a decreased veterinary antimicrobial use  
777 and resistance in commensal *Escherichia coli* from Belgian livestock species  
778 (2011–2015). *Prev Vet Med* 157:50–58.
- 779 54. Catry B, Dewulf J, Maes D, Pardon B, Callens B, Vanrobaeys M, Opsomer G,  
780 Kruif A de, Haesebrouck F. 2016. Effect of antimicrobial consumption and  
781 production type on antibacterial resistance in the bovine respiratory and  
782 digestive tract. *PLoS One* 11:e0146488.

- 783 55. Shintani M, Takahashi Y, Tokumaru H, Kadota K, H H, Miyakoshi M, Naito K,  
784 Yamane H, Nishida H, Nojiri H. 2009. Response of the *Pseudomonas* host  
785 chromosomal transcriptome to carriage of the IncP-7 plasmid pCAR1. Environ  
786 Microbiol 12:1413–1426.
- 787 56. Bouma JE, Lenski RE. 1988. Evolution of a bacteria/plasmid association. Nature  
788 335:351–352.
- 789 57. Smith MA, Bidochka MJ. 1998. Bacterial fitness and plasmid loss: the  
790 importance of culture conditions and plasmid size. Can J Microbiol 44:351–355.
- 791 58. Leatham MP, Stevenson SJ, Gauger EJ, Krogfelt KA, Lins JJ, Haddock TL,  
792 Autieri SM, Conway T, Cohen PS. 2005. Mouse intestine selects nonmotile  
793 *flhDC* mutants of *Escherichia coli* MG1655 with increased colonizing ability and  
794 better utilization of carbon sources. Infect Immun 73:8039–8049.
- 795 59. Fabich AJ, Leatham MP, Grissom JE, Wiley G, Lai H, Najjar F, Roe BA, Cohen  
796 PS, Conway T. 2011. Genotype and phenotypes of an intestine-adapted  
797 *Escherichia coli* K-12 mutant selected by animal passage for superior  
798 colonization. Infect Immun 79:2430–2439.
- 799 60. Mourand G, Touzain F, Jouy E, Fleury MA, Denamur E, Kempf I. 2016. Rare  
800 spontaneous loss of multiresistance gene carrying IncI/ST12 plasmid in  
801 *Escherichia coli* in pig microbiota. Antimicrob Agents Chemother 60:6046–6049.
- 802 61. Mourand G, Paboeuf F, Fleury MA, Jouy E, Bougeard S, Denamur E, Kempf I.  
803 2017. *Escherichia coli* probiotic strain ED1a in pigs has a limited impact on the  
804 gut carriage of extended-spectrum- $\beta$ -lactamase-producing *E. coli*. Antimicrob  
805 Agents Chemother 61:e01293-16.

- 806 62. Enne VI, Delsol AA, Davis GR, Hayward SL, Roe JM, Bennett PM. 2005.  
807 Assessment of the fitness impacts on *Escherichia coli* of acquisition of antibiotic  
808 resistance genes encoded by different types of genetic element. *J Antimicrob*  
809 *Chemother* 56:544–551.
- 810 63. Giles M, Cawthraw SA, AbuOun M, Thomas CM, Munera D, Waldor MK, La  
811 Ragione RM, Ritchie JM. 2018. Host-specific differences in the contribution of  
812 an ESBL IncI1 plasmid to intestinal colonization by *Escherichia coli* O104:H4. *J*  
813 *Antimicrob Chemother* 73:1579–1585.
- 814 64. Doyle M, Fookes M, Ivens A, Mangan MW, Wain J, Dorman CJ. 2007. An H-  
815 NS-like stealth protein aids horizontal DNA transmission in bacteria. *Science*  
816 315:251–252.
- 817 65. Navarre WW, Porwollik S, Wang Y, McClelland M, Rosen H, Libby SJ, Fang FC.  
818 2006. Selective silencing of foreign DNA with low GC content by the H-NS  
819 protein in *Salmonella*. *Science* 313:236–238.
- 820 66. Kantele A, Kuenzli E, Dunn SJ, Dance DAB, Newton PN, Davong V, Mero S,  
821 Pakkanen SH, Neumayr A, Hatz C, Snaith A, Kallonen T, Corander J, McNally  
822 A. 2021. Dynamics of intestinal multidrug-resistant bacteria colonisation  
823 contracted by visitors to a high-endemic setting: a prospective, daily, real-time  
824 sampling study. *Lancet Microbe* 2:e151–e158.
- 825 67. Ruppé E, Armand-Lefèvre L, Estellat C, Consigny P-H, El Mniai A, Boussadia Y,  
826 Goujon C, Ralaimazava P, Campa P, Girard P-M, Wyplosz B, Vittecoq D,  
827 Bouchaud O, Le Loup G, Pialoux G, Perrier M, Wieder I, Moussa N, Esposito-  
828 Farèse M, Hoffmann I, Coignard B, Lucet J-C, Andremont A, Matheron S. 2015.

- 829 High rate of acquisition but short duration of carriage of multidrug-resistant  
830 *Enterobacteriaceae* after travel to the tropics. Clin Infect Dis 61:593–600.
- 831 68. Furet J-P, Firmesse O, Gourmelon M, Bridonneau C, Tap J, Mondot S, Doré J,  
832 Corthier G. 2009. Comparative assessment of human and farm animal faecal  
833 microbiota using real-time quantitative PCR. FEMS Microbiol Ecol 68:351–362.
- 834 69. Lee JE, Lee S, Sung J, Ko G. 2011. Analysis of human and animal fecal  
835 microbiota for microbial source tracking. 2. ISME J 5:362–365.
- 836 70. Ellis RJ, Bruce KD, Jenkins C, Stothard JR, Ajarova L, Mugisha L, Viney ME.  
837 2013. Comparison of the distal gut microbiota from people and animals in Africa.  
838 PLOS ONE 8:e54783.
- 839 71. Smati M, Clermont O, Bleibtreu A, Fourreau F, David A, Daubié A-S, Hignard C,  
840 Loison O, Picard B, Denamur E. 2015. Quantitative analysis of commensal  
841 *Escherichia coli* populations reveals host-specific enterotypes at the intra-  
842 species level. MicrobiologyOpen 4:604–615.
- 843 72. Tenailon O, Skurnik D, Picard B, Denamur E. 2010. The population genetics of  
844 commensal *Escherichia coli*. Nat Rev Microbiol 8:207–217.
- 845 73. Mercat M, Clermont O, Massot M, Ruppe E, Garine-Wichatitsky M de, Miguel E,  
846 Fox HV, Cornelis D, Andremont A, Denamur E, Caron A. 2016. *Escherichia coli*  
847 population structure and antibiotic resistance at a buffalo/cattle interface in  
848 Southern Africa. Appl Environ Microbiol 82:1459–1467.
- 849 74. Valat C, Drapeau A, Beurlet S, Bachy V, Boulouis H-J, Pin R, Cazeau G, Madec  
850 J-Y, Haenni M. 2020. Pathogenic *Escherichia coli* in dogs reveals the

- 851       predominance of ST372 and the human-associated ST73 extra-intestinal  
852       lineages. *Front Microbiol* 11.
- 853   75. Bjedov I, Tenaillon O, Gérard B, Souza V, Denamur E, Radman M, Taddei F,  
854       Matic I. 2003. Stress-induced mutagenesis in bacteria. *Science* 300:1404–1409.
- 855   76. Méric G, Kemsley EK, Falush D, Saggers EJ, Lucchini S. 2013. Phylogenetic  
856       distribution of traits associated with plant colonization in *Escherichia coli*.  
857       *Environ Microbiol* 15:487–501.
- 858   77. Segura A, Auffret P, Bibbal D, Bertoni M, Durand A, Jubelin G, Kérourédan M,  
859       Brugère H, Bertin Y, Forano E. 2018. Factors involved in the persistence of a  
860       Shiga toxin-producing *Escherichia coli* O157:H7 strain in bovine feces and  
861       gastro-intestinal content. *Front Microbiol* 9:375.
- 862   78. Gordon DM, Bauer S, Johnson JR. 2002. The genetic structure of *Escherichia*  
863       *coli* populations in primary and secondary habitats. *Microbiol Read Engl*  
864       148:1513–1522.
- 865   79. Berthe T, Ratajczak M, Clermont O, Denamur E, Petit F. 2013. Evidence for  
866       coexistence of distinct *Escherichia coli* populations in various aquatic  
867       environments and their survival in estuary water. *Appl Environ Microbiol*  
868       79:4684–4693.
- 869   80. Humphrey B, Thomson NR, Thomas CM, Brooks K, Sanders M, Delsol AA, Roe  
870       JM, Bennett PM, Enne VI. 2012. Fitness of *Escherichia coli* strains carrying  
871       expressed and partially silent IncN and IncP1 plasmids. *BMC Microbiol* 12:53.

- 872 81. Di Luca MC, Sørnum V, Starikova I, Kloos J, Hülter N, Naseer U, Johnsen PJ,  
873 Samuelsen Ø. 2017. Low biological cost of carbapenemase-encoding plasmids  
874 following transfer from *Klebsiella pneumoniae* to *Escherichia coli*. J Antimicrob  
875 Chemother 72:85–89.
- 876 82. Mahérault A-C, Kemble H, Magnan M, Gachet B, Roche D, Le Nagard H,  
877 Tenaillon O, Denamur E, Branger C, Landraud L. 2019. Advantage of the  
878 F2:A1:B- IncF pandemic plasmid over IncC plasmids in *in vitro* acquisition and  
879 evolution of *bla*CTX-M gene-bearing plasmids in *Escherichia coli*. Antimicrob  
880 Agents Chemother 63:e01130-19.
- 881 83. Silva RF, Mendonça SCM, Carvalho LM, Reis AM, Gordo I, Trindade S, Dionisio  
882 F. 2011. Pervasive sign epistasis between conjugative plasmids and drug-  
883 resistance chromosomal mutations. PLoS Genet 7:e1002181.
- 884 84. San Millan A, Heilbron K, MacLean RC. 2014. Positive epistasis between co-  
885 infecting plasmids promotes plasmid survival in bacterial populations. 3. ISME J  
886 8:601–612.
- 887 85. Benz F, Huisman JS, Bakkeren E, Herter JA, Stadler T, Ackermann M, Diard M,  
888 Egli A, Hall AR, Hardt W-D, Bonhoeffer S. 2020. Plasmid- and strain-specific  
889 factors drive variation in ESBL-plasmid spread *in vitro* and *in vivo*. ISME J 1–17.
- 890 86. Dupouy V, Madec J-Y, Wucher J, Arpaillange N, Métayer V, Roques B,  
891 Bousquet-Mélou A, Haenni M. 2021. Selection of ESBL-producing *Escherichia*  
892 *coli* in the gut of calves experimentally fed with milk containing antibiotic  
893 residues. Vet Microbiol 109049.

894 87. Thiry D, Saulmont M, Takaki S, De Rauw K, Duprez J-N, Iguchi A, Piérard D,  
895 Mainil JG. 2017. Enteropathogenic *Escherichia coli* O80:H2 in young calves with  
896 diarrhea, Belgium. *Emerg Infect Dis* 23:2093–2095.

897 88. Horton RA, Randall LP, Snary EL, Cockrem H, Lotz S, Wearing H, Duncan D,  
898 Rabie A, McLaren I, Watson E, La Ragione RM, Coldham NG. 2011. Fecal  
899 carriage and shedding density of CTX-M extended-spectrum  $\beta$ -lactamase-  
900 producing *Escherichia coli* in cattle, chickens, and pigs: implications for  
901 environmental contamination and food production. *Appl Environ Microbiol*  
902 77:3715–3719.

903

#### 904 **FIGURE TITLES & LEGENDS**

905 **Fig. 1. Scheme of sampling dates and collective antibiotic treatments for each**  
906 **veal farm.** Sampling points for farm A, farm B, and farm C are represented in the  
907 upper panel, middle panel, and lower panel, respectively. “N” indicates the number of  
908 calves studied on each farm. The samplings are indicated by black dots. Antibiotic  
909 treatments are indicated by bold lines or triangles, and the names of the antibiotics  
910 are given in the legend. Of note, one calf on farm C died during the fattening period  
911 and was excluded from the study.

912 **Fig. 2. Quantification of ESBL-producing *Enterobacteriaceae* carriage and of**  
913 ***bla*<sub>CTX-M</sub> gene copy numbers.** For each sample, panel A represents the load of  
914 colonies on ESBL-producing *Enterobacteriaceae* selective medium after 24 hours at  
915 37°C. Samples are represented by dots and are arranged according to farms,  
916 calves, and time. Dots linked by a line are the samples of the same calf, which ID is  
917 provided on the left of each line. Calves of farm A, farm B, and farm C are

918 represented on the left, middle, and right of the panel A, respectively. Calves are  
919 clustered according to the pen they shared. Panel B represents the total number of  
920 copies of *bla*<sub>CTX-M</sub> genes estimated by qPCR targeting group 1 and group 9. The limit  
921 of quantification was 10<sup>6</sup> copies of *bla*<sub>CTX-M</sub> genes / g of feces (indicated by a dotted  
922 line). Each dot represents one sample. For each calf, quantification was done on  
923 samples collected 7 days and 21 days after arrival in the farm, and on one sample by  
924 month. The days corresponding to samples processed are indicated on the x-axis.  
925 Samples of farm A, farm B, and farm C are represented on the left, middle, and right  
926 of panel B, respectively.

927 **Fig. 3. Detection of ESBL-producing *E. coli* clones in each farm over the**  
928 **fattening.** For each sample, one ESBL-producing *E. coli* isolate was randomly  
929 selected for molecular characterization. ESBL-producing *E. coli* isolates were  
930 grouped according to their PFGE profiles. At least one isolate per group of identical  
931 PFGE profiles was selected for WGS. A clone was defined according to the  
932 combination of the phylogroup, ST Achtman/ST Pasteur Institute, serotype, and *fimH*  
933 allele gene identified. Two isolates harboring the same PFGE profile were  
934 considered to be related to the same clone. The distribution of the clones detected in  
935 farms A, B, and C are represented on panels A, B, and C, respectively. The days are  
936 indicated on the x-axis of each panel. Calves are clustered according to the pen they  
937 shared. Dots linked by a line are the samples of the same calf, which ID is provided  
938 on the left of each line. The color of the dot indicates the ESBL-producing *E. coli*  
939 clone that was isolated from this sample, and its shape represents the *bla*<sub>CTX-M</sub> gene  
940 it carried. Clones' full names are indicated in the legend. In farm C, one isolate was  
941 lost before any genotypic characterization and is depicted by an 'X' (isolated at day  
942 21 in calf 'C0191'). 'UG': unassigned phylogroup.



943 **Fig. 4. Characterization of *E. coli* clone and plasmid combinations carrying**  
944 ***bla*<sub>CTX-M-1</sub> gene.** Number of isolates for each ESBL-producing *E. coli* clones carrying  
945 the *bla*<sub>CTX-M-1</sub> gene and its molecular supports. The distribution of the clones detected  
946 in farms A, B, and C are represented on panels A, B, and C, respectively.  
947 Genotyping methods involving PFGE and followed by WGS were used to  
948 discriminate bacterial clones. Plasmids carrying a *bla*<sub>CTX-M</sub> gene were characterized  
949 using WGS after conjugation in a K-12 strain. The number of Single Nucleotide  
950 Polymorphisms (SNPs) on the plasmid core genome was used to discriminate  
951 plasmid lineages, using a threshold of 100 SNPs. For each ESBL-producing *E. coli*  
952 clone, we looked for the presence of the plasmid carrying *bla*<sub>CTX-M</sub> gene in all of its  
953 isolates by replicon typing. When needed, the discriminant allele of the pMLST  
954 scheme was sequenced (FII allele in the FAB formula, *ardA* gene in the Incl1 pMLST  
955 scheme).

956 **Fig. 5. Characterization of *E. coli* clone and plasmid combinations carrying**  
957 ***bla*<sub>CTX-M-14</sub> gene.** Number of isolates for each ESBL-producing *E. coli* clones carrying  
958 the *bla*<sub>CTX-M-14</sub> gene and its molecular supports. The distribution of the clones  
959 detected in farms A, B, and C are represented on panels A, B, and C, respectively.  
960 Genotyping methods involving PFGE and followed by WGS were used to  
961 discriminate bacterial clones. Plasmids carrying a *bla*<sub>CTX-M</sub> gene were characterized  
962 using WGS after conjugation in a K-12 strain. The number of Single Nucleotide  
963 Polymorphisms (SNPs) on the plasmid core genome was used to discriminate  
964 plasmid lineages, using a threshold of 100 SNPs. For each ESBL-producing *E. coli*  
965 clone, we looked for the presence of the plasmid carrying *bla*<sub>CTX-M</sub> gene in all of its  
966 isolates by replicon typing. When needed, the discriminant allele of the pMLST

967 scheme was sequenced (FII allele in the FAB formula, *ardA* gene in the InCl1 pMLST  
968 scheme).

969 **Fig. 6. Number of calves colonized by ESBL-producing *E. coli* clones**  
970 **according to their duration of detection in farms.** The duration of detection of  
971 each clone is represented on the x-axis, and corresponds to the difference between  
972 the last day and the first day a clone was detected in a farm. The y-axis represents  
973 the number of calves within a farm in which clones were detected. Each dot  
974 represents an ESBL-producing *E. coli* clone, and its shape represents the *bla*<sub>CTX-M</sub>  
975 gene it carried. The size of clones found in several farms is increased compared to  
976 the clones that were detected in one farm. For clones that were found in several  
977 farms, the longest detection time and the highest number of calves colonized is  
978 provided. A zoom on the clones found at only one sampling time was added to  
979 increase the readability of the figure.

980 **Fig. 7. Detection of ESBL-producing *E. coli* clones carrying the *mcr-1* gene and**  
981 **characterization of *mcr-1* gene-carrying *E. coli* clone and plasmid**  
982 **combinations in farm A.** Panel A represents samples in which ESBL-producing *E.*  
983 *coli* isolates carrying the *mcr-1* gene (big black dots) in farm A. In each isolate,  
984 detection of the *mcr-1* gene was done by PCR. Dots linked by a line are the samples  
985 of the same calf, which ID is provided on the left of each line. Calves are clustered  
986 according to the pen they shared. Genotyping methods involving PFGE and followed  
987 by WGS were used to discriminate bacterial clones. Plasmids carrying the *mcr-1*  
988 gene were characterized using WGS after conjugation in a K-12 strain. The number  
989 of Single Nucleotide Polymorphisms (SNPs) on the plasmid core genome was used  
990 to discriminate plasmid lineages, using a threshold of 100 SNPs. Panel B represents  
991 the number of isolates per combination carrying the *mcr-1* gene in farm A. As the

992 *mcr-1* gene was not found in all the isolates of a given ESBL-producing *E. coli* clone,  
993 transparent dots representing the total number of isolates of a given clone were  
994 added. For each ESBL-producing *E. coli* clone, we looked for the presence of the  
995 plasmid carrying the *mcr-1* gene in all of its isolates by replicon typing.

996 **Fig. S1. Distribution of the number of SNPs in bacterial core-genomes**  
997 **according to the delineation of the isolates sequenced in haplogroups and in**  
998 **clones.** Panel A represents the distribution of the number of core-genome Single  
999 Nucleotide Polymorphisms (SNPs) between isolates from the same haplogroup or  
1000 from different haplogroups. An haplogroup is defined as an unique combination of  
1001 the sequence types (ST) according to the Achtman scheme and the Pasteur Institute  
1002 scheme, their serotype (O:H) and their *fimH* allele. Each point is the number of SNPs  
1003 between two core genomes. The number of pairwise comparisons is provided below  
1004 each group name. Panel B represents the distribution of the number of core-genome  
1005 SNPs between isolates of the same haplogroup. Panel C represents the pulsed-field  
1006 gel electrophoresis profile of the four isolates of the haplogroup 'ST10/2 O101:H9  
1007 *fimH54* in which we delineate three clones. Panel D represents the distribution of the  
1008 number of core-genome SNPs between isolates of the same clone. A clone is  
1009 defined as an unique combination of the phylogroup, the haplogroup, and a number  
1010 of SNPs between two isolates of the haplogroup inferior to 100 SNP.

1011 **Fig. S2. Distribution of the number of SNPs in plasmid core-genomes and**  
1012 **phylogenetic delineation of the IncI1/ST3 plasmids.** For each type of plasmid,  
1013 panel A represents the distribution of the number of Single Nucleotide  
1014 Polymorphisms (SNPs) in their core genomes. Plasmids were grouped according to  
1015 the antibiotic resistance gene they carried (either *bla<sub>CTX-M1</sub>*, *bla<sub>CTX-M14</sub>* or *mcr-1*).  
1016 Panel B represents the distribution of the number of SNPs in the core genome

1017 between the Incl1/ST3 lineages. Panel C represents the genomic content unique to  
1018 one Incl1/ST3 lineage or shared between lineages (shell and core in the legend).  
1019 The name of each donor strain is indicated on the x-axis. Plasmids were grouped  
1020 according to the Incl1/ST3 lineage they belonged to. Shell genome corresponds to  
1021 coding sequences that were present in more than one Incl1/ST3 lineage, but not all  
1022 of them. CDS: Coding DNA Sequence, TC: Transconjugant

1023 **Fig. S3A. PFGE profiles of the ESBL-producing *E. coli* isolates in farm A.**

1024 Pulsed-field gel electrophoresis (PFGE) was performed on all putative ESBL-  
1025 producing *E. coli* isolates using the restriction enzyme *Xba*I. Comparison of PFGE  
1026 profiles was done among isolates to discriminate between ESBL-producing *E. coli*  
1027 strains circulating in the farm and to select one representative of each PFGE profile  
1028 for whole genome sequencing. Two isolates were considered to be related to  
1029 different genotypes if their PFGE profiles differed from at least one band. Isolates  
1030 having a different status regarding the presence of the *mcr-1* gene compared to their  
1031 group were additionally selected for genome sequencing. The isolate ID and the  
1032 sample code (the animal ID followed by the sampling rank) are displayed on the left  
1033 of the PFGE patterns. On the right, genotypic markers characterized on all isolates,  
1034 *i.e.* phylogroup, *bla*<sub>CTX-M</sub> enzyme and presence of the *mcr-1* gene are represented.  
1035 The clone ID and the *bla*<sub>CTX-M</sub> gene molecular support are indicated in front of the  
1036 isolates that were sequenced. Plasmid sequences were obtained from isolates with  
1037 clone ID in bold after conjugation with a K-12 strain. Isolates of different clones are  
1038 colored according to the *bla*<sub>CTX-M</sub> gene molecular support. The isolates 40739,  
1039 40742, and 41536 had a smear profile and thus are not depicted in this PFGE figure.  
1040 Clone identification of the isolates 40739 ('F ST354/39 O1:H34 *fimH58*') and 40742  
1041 ('A ST10/466 O8:H32 *fimH23*') was done by sequencing, while the isolate 41536

1042 was found to be related to the clone 'A ST10/466 O8:H32 *fimH23*' through MLVA  
1043 profile comparisons. COL: Colistin, ESC: Extended-Spectrum Cephalosporins, 'UG':  
1044 unassigned phylogroup.

1045 **Fig. S3B. PFGE profiles of the ESBL-producing *E. coli* isolates in farm B.** COL:  
1046 Colistin, ESC: Extended-Spectrum Cephalosporins.

1047 **Fig. S3C. PFGE profiles of the ESBL-producing *E. coli* isolates in farm C.** COL:  
1048 Colistin, ESC: Extended-Spectrum Cephalosporins.

1049 **Fig. S4A. Maximum likelihood phylogenetic tree of ESBL-producing *E. coli***  
1050 **clones.** A representative of each pulsed-field gel electrophoresis (PFGE) profile was  
1051 selected for whole genome sequencing (WGS). If different *bla*<sub>CTX-M</sub> genes were  
1052 detected among a group of isolates having the same PFGE profile, an isolate  
1053 carrying each of the *bla*<sub>CTX-M</sub> genes was selected. Isolates carrying the *mcr-1* gene  
1054 were additionally selected for WGS. The leaves are composed of the isolate ID, then  
1055 a combination of colored squares representing different O-antigen, H-antigen, and  
1056 *fimH* gene alleles. The clone was defined by a combination of the phylogroup, ST  
1057 Achtman/ST Pasteur Institute, serotype, and *fimH* allele gene. The different *bla*<sub>CTX-M</sub>  
1058 enzymes detected, the presence of the *mcr-1* gene and the farm in which isolates  
1059 were sampled are indicated on the right of the tree. The tree was rooted on the *E. coli*  
1060 ED1a strain, from the B2 phylogroup. It was built using FastTree 2, and is based on  
1061 the 200,875 SNPs of the 3,003 genes that composed the core genome of this set of  
1062 43 genomes. For clarity purpose, the tree presents only 41 isolate IDs because two  
1063 clones were sequenced in duplicate because of PFGE profile differences ('A  
1064 ST10/466 O8:H32 *fimH23*', 'A ST301/917 O80:H2 *fimH54*'). 'SNPs': Single  
1065 Nucleotide Polymorphisms, 'UG': unassigned phylogroup.

1066 **Fig. S4B. Number of isolates and duration of detection of ESBL-producing *E.***  
1067 ***coli* clones.** For each farm, the left plot represents the number of times each clone  
1068 was detected and the right plot represents the days they were isolated. Each color  
1069 refers to one clone, and the shape represents the *bla*<sub>CTX-M</sub> gene. The clones are  
1070 ordered according to their phylogenetic group. The clone was defined by a  
1071 combination of the phylogroup, ST Achtman/ST Pasteur Institute, serotype, and *fimH*  
1072 allele gene.

1073 **Fig. S4C. Resistome of ESBL-producing *E. coli* clones.** Heatmap of the antibiotic  
1074 resistance genes detected in the ESBL-producing *E. coli* clones using the ResFinder  
1075 database. Resistance genes are indicated on the x-axis and are grouped per class of  
1076 antibiotics. *E. coli* clones are indicated on the y-axis and are grouped according to  
1077 the farm in which they were isolated. The clone was defined by a combination of the  
1078 phylogroup, ST Achtman/ST Pasteur Institute, serotype, and *fimH* allele gene.  
1079 Resistance genes were considered to be carried by a clone if it was found in at least  
1080 one sequenced genome of this clone. The number of isolates per clone in each farm  
1081 is displayed on the right of the plot. 'UG': unassigned phylogroup.

1082 **Fig. S5A. Distribution of extraintestinal pathogenic virulence genes detected in**  
1083 **ESBL-producing *E. coli* clones.** Heatmap of the virulence genes associated with  
1084 extraintestinal pathogenic *E. coli*, using the VFDB and VirulenceFinder databases.  
1085 Virulence genes are indicated on the x-axis and are grouped per function encoded.  
1086 ESBL-producing *E. coli* clones are indicated on the y-axis and are grouped  
1087 according to the farm in which they were isolated. The clone was defined by a  
1088 combination of the phylogroup, ST Achtman/ST Pasteur Institute, serotype, and *fimH*  
1089 allele gene. The number of extraintestinal pathogenic virulence genes detected in  
1090 each clone on the right.

1091 **Fig. S5B. Distribution of intestinal pathogenic virulence genes detected in**  
1092 **ESBL-producing *E. coli* clones.** Heatmap of the virulence genes associated with  
1093 intestinal pathogenic *E. coli*, using the VFDB and VirulenceFinder databases.  
1094 Virulence genes are indicated on the x-axis and are grouped per function encoded.  
1095 ESBL-producing *E. coli* clones are indicated on the y-axis and are grouped  
1096 according to the farm in which they were isolated. The clone ID is a combination of  
1097 the phylogroup, ST Achtman/ST Pasteur Institute, serotype, and *fimH* allele gene.  
1098 The number of intestinal pathogenic virulence genes detected in each clone is  
1099 displayed on the right.

1100 **Fig. S5C. Distribution of pathogenic virulence genes associated with both**  
1101 **extraintestinal and intestinal pathogenicity, and bacteriocins detected in ESBL-**  
1102 **producing *E. coli* clones.** Heatmap of the virulence genes associated with both  
1103 extraintestinal and intestinal pathogenic *E. coli*, using the VFDB and VirulenceFinder  
1104 databases and of the bacteriocins detected in the isolates sequenced. Virulence  
1105 genes are indicated on the x-axis and are grouped per function encoded. ESBL-  
1106 producing *E. coli* clones are indicated on the y-axis and are grouped according to the  
1107 farm in which they were isolated. The clone ID is a combination of the phylogroup,  
1108 ST Achtman/ST Pasteur Institute, serotype, and *fimH* allele gene. The number of  
1109 virulence genes detected in each clone is displayed on the right.

1110 **Fig. S6A. Linear map of the chromosomal environment of *bla*<sub>CTX-M-15</sub> gene and**  
1111 ***mcr-1* gene.** The chromosomal environment of the *bla*<sub>CTX-M-15</sub> gene found in the  
1112 clone 'A ST10/2 O101:H9 *fimH54* clone2' isolated in farms B and C (isolate IDs  
1113 40772 and 41054, respectively) is represented on the top of the figure. The  
1114 chromosomal environments of the *mcr-1* gene in clones 'F ST354/39 O1:H34  
1115 *fimH58*' in farm A (isolate ID 40808) and 'G ST117/48 O24:H4 *fimH189*' in farm C

1116 (isolate ID 41301), are represented on the middle and the bottom of the figure,  
1117 respectively. The antibiotic resistance genes are indicated by red arrows. Open  
1118 reading frames are shown as arrows indicating the direction of transcription (dark  
1119 blue, plasmid transfer; red, resistance; pink, mobile elements). The name of genes is  
1120 indicated within the arrows. The genome references against which contigs containing  
1121 the genes were blasted are indicated below the maps.

1122 **Fig. S6B. Circular maps of prevalent plasmids carrying *bla*<sub>CTX-M</sub> genes and**  
1123 ***mcr-1* gene.** The genome of transconjugants (TC) carrying plasmid-borne ESBL-  
1124 encoding genes or *mcr-1* gene were sequenced to characterize the molecular  
1125 environment of these antibiotic resistance genes. Plasmids were identified using the  
1126 PlasmidFinder database and reference genomes were found by blasting contigs  
1127 against MaGe or Refseq databases. The map and size of plasmids IncI1/ST312,  
1128 IncF/F2:A:B-, and IncX4 are represented on the left, the middle and the right of the  
1129 plot, respectively. Open reading frames are shown as boxes colored according to the  
1130 function of their product. ESBL-encoding genes (*bla*<sub>CTX-M-1</sub> and *bla*<sub>CTX-M-14</sub> genes) and  
1131 *mcr-1* gene are indicated in red on the map. Single Nucleotide Polymorphisms  
1132 (SNPs) detected in the plasmidic contigs of the TC are represented by black lines.  
1133 The donor strain ID of each TC is given below the figure, and the farm in which it  
1134 was isolated is provided between brackets.

1135 **Fig. S6C. Circular maps of plasmids carrying *bla*<sub>CTX-M</sub> genes.** The genome of  
1136 transconjugants (TC) carrying plasmid-borne ESBL-encoding genes or *mcr-1* gene  
1137 were sequenced to characterize the molecular environment of these antibiotic  
1138 resistance genes. Plasmids were identified using the PlasmidFinder database and  
1139 reference genomes were found by blasting contigs against MaGe or Refseq  
1140 databases. The map and size of plasmids IncI1/ST3, IncF/F59:A:B-, and IncK are



1141 represented on the left, the middle and the right of the plot, respectively. Open  
1142 reading frames are shown as boxes colored according to the function of their  
1143 product. ESBL-encoding genes (*bla*<sub>CTX-M-1</sub> and *bla*<sub>CTX-M-14</sub> genes) and *mcr-1* gene are  
1144 indicated in red on the map. Single Nucleotide Polymorphisms (SNPs) and deletions  
1145 detected in the plasmidic contigs of the TC are represented by black and white lines,  
1146 respectively. The donor strain ID of each TC is given below the figure, and the farm  
1147 in which it was isolated is provided between brackets. For IncI1/ST3 plasmid, the  
1148 lineage of each plasmid sequenced is indicated below the figure.

1149 **Table S1A. Summary of the origin and molecular characteristics of the ESBL-**  
1150 **producing *E. coli* isolates and plasmids.** Pulsed-field gel electrophoresis (PFGE)  
1151 was performed on all putative ESBL-producing *E. coli* isolates using the restriction  
1152 enzyme *Xba*I. Comparison of PFGE profiles was done among isolates to  
1153 discriminate between ESBL-producing *E. coli* strains circulating in the farm and to  
1154 select one representative of each PFGE profile for whole genome sequencing. Two  
1155 isolates were considered to be related to different genotypes if their PFGE profiles  
1156 differed from at least one band. Isolates having a different status regarding the  
1157 presence of the *mcr-1* gene compared to their group were additionally selected for  
1158 genome sequencing. The clone ID and the sample code (the animal ID followed by  
1159 the sampling rank) are also presented in the table.

1160 **Table S1B. Summary of the origin and molecular characteristics of the**  
1161 **plasmids carrying *bla*<sub>CTX-M</sub> genes and *mcr-1* gene.** The genome of  
1162 transconjugants (TC) carrying plasmid-borne ESBL-encoding genes or *mcr-1* gene  
1163 were sequenced to characterize the molecular environment of these antibiotic  
1164 resistance genes. Plasmids were identified using the PlasmidFinder database and

1165 reference genomes were found by blasting contigs against MaGe or Refseq  
1166 databases.

1167 **Table S2. Posthoc Dunn's test results, comparison of the number of copies of**  
1168 ***bla*<sub>CTX-M</sub> genes ( $\log_{10}(\text{copies} / \text{g})$ ) estimated by quantitative PCR between the**  
1169 **samples grouped according to the number of colonies on ESBL-producing**  
1170 ***Enterobacteriaceae* selective medium.** Quantification of *bla*<sub>CTX-M</sub> group 1 and  
1171 *bla*<sub>CTX-M</sub> group 9 gene copies was performed by qPCR on samples collected 7 days  
1172 and 21 days after arrival in farms, and one by month for each calf.

1173 **Table S3A.** Phenotypic prevalence of antibiotic co-resistances in the ESBL-  
1174 producing *E. coli* isolates (n= 173). Antibiotics are sorted in descending order  
1175 according to their frequency and classes.

1176 **Table S3B. Quinolone resistance mutations detected in the ESBL-producing *E.***  
1177 ***coli* isolates.** Quinolone resistance point mutations were searched using the website  
1178 “Center for Genomic Epidemiology” with standard parameters.

1179

**Fig. 1. Scheme of sampling dates and collective antibiotic treatments for each veal farm.** Sampling points for farm A, farm B, and farm C are represented in the upper panel, middle panel, and lower panel, respectively. “N” indicates the number of calves studied on each farm. The samplings are indicated by black dots. Antibiotic treatments are indicated by bold lines or triangles, and the names of the antibiotics are given in the legend. Of note, one calf on farm C died during the fattening period and was excluded from the study.

### Farm A (N = 15)

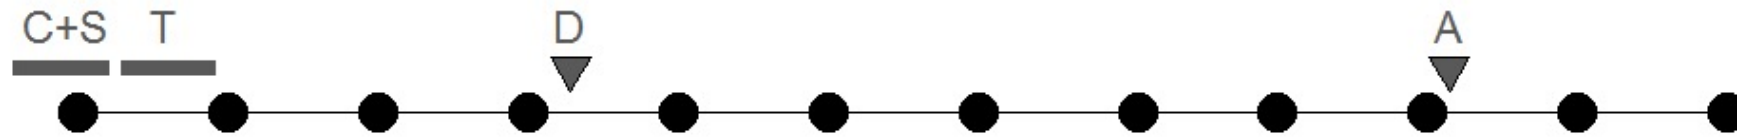

### Farm B (N = 15)

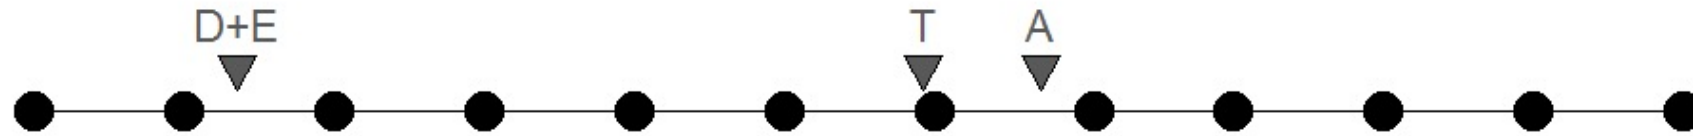

### Farm C (N = 15)

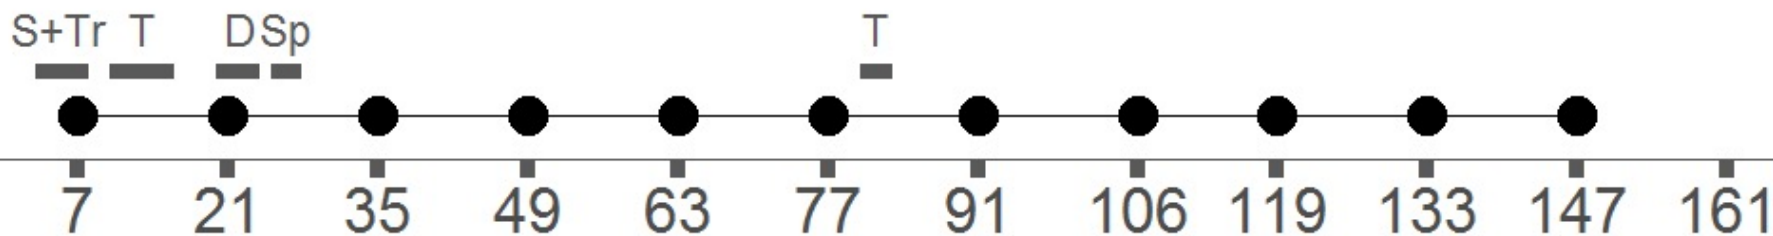

Time (days in farm)

Antibiotic treatments

A: Amoxicillin

C: Colistin

D: Doxycycline

E: Erythromycin

S: Sulfonamides

Sp: Spiramycin

T: Tetracycline

Tr: Trimethoprim

▼ : One day treatment

■ : Extended treatment

**Fig. 2. Quantification of ESBL-producing *Enterobacteriaceae* carriage and of *bla*<sub>CTX-M</sub> gene copy numbers.** For each sample, panel A represents the load of colonies on ESBL-producing *Enterobacteriaceae* selective medium after 24 hours at 37°C. Samples are represented by dots and are arranged according to farms, calves, and time. Dots linked by a line are the samples of the same calf, which ID is provided on the left of each line. Calves of farm A, farm B, and farm C are represented on the left, middle, and right of the panel A, respectively. Calves are clustered according to the pen they shared. Panel B represents the total number of copies of *bla*<sub>CTX-M</sub> genes estimated by qPCR targeting group 1 and group 9. The limit of quantification was 10<sup>6</sup> copies of *bla*<sub>CTX-M</sub> genes / g of feces (indicated by a dotted line). Each dot represents one sample. For each calf, quantification was done on samples collected 7 days and 21 days after arrival in the farm, and on one sample by month. The days corresponding to samples processed are indicated on the x-axis.

**A**

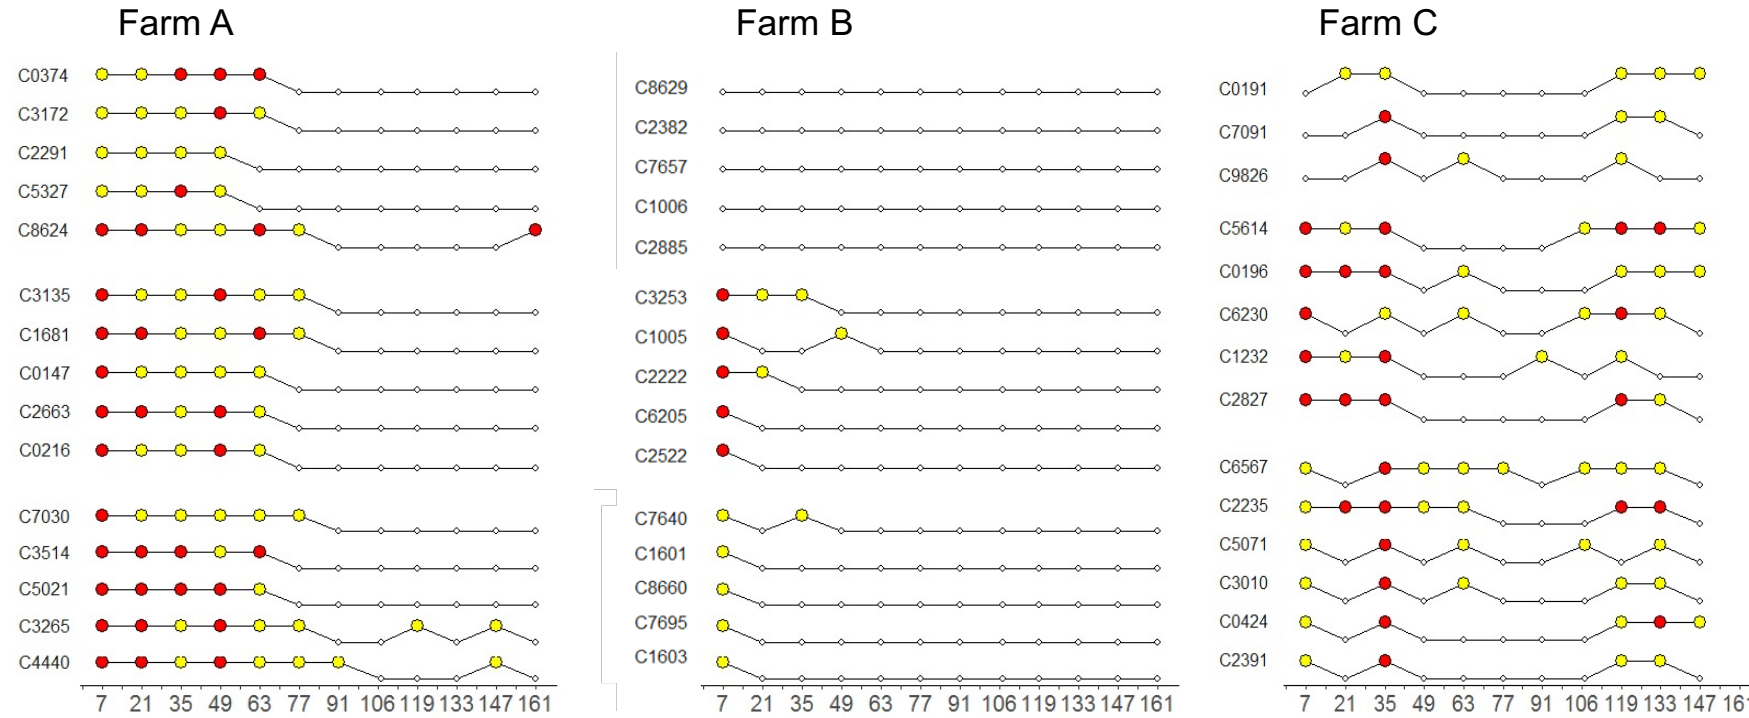

Range of colony counts on chromID ESBL agar

○ : No colony  
 ● : 1-100 colonies  
 ● : >100 colonies

**B**

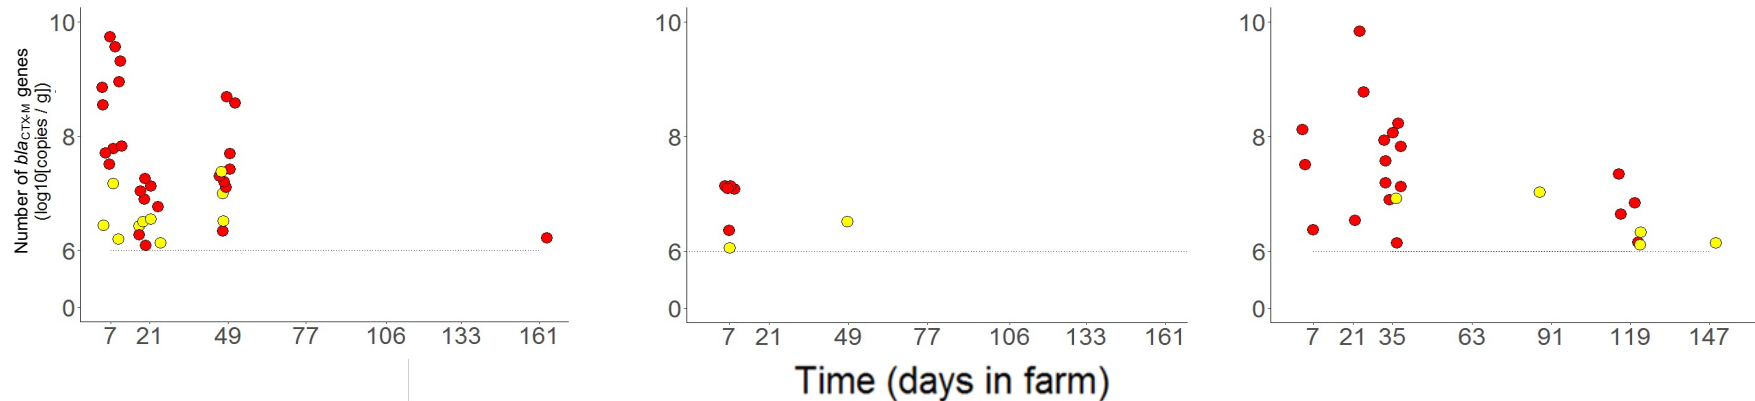

**Fig. 3. Detection of ESBL-producing *E. coli* clones in each farm over the fattening.** For each sample, one ESBL-producing *E. coli* isolate was randomly selected for molecular characterization. ESBL-producing *E. coli* isolates were grouped according to their PFGE profiles. At least one isolate per group of identical PFGE profiles was selected for WGS. A clone was defined according to the combination of the phylogroup, ST Achtman/ST Pasteur Institute, serotype, and *fimH* allele gene identified. Two isolates harboring the same PFGE profile were considered to be related to the same clone. The days are indicated on the x-axis of each panel. Calves are clustered according to the pen they shared. Dots linked by a line are the samples of the same calf, which ID is provided on the left of each line. Clones' full names are indicated in the legend. In farm C, one isolate was lost before any genotypic characterization and is depicted by an 'X' (isolated at day 21 in calf 'C0191').

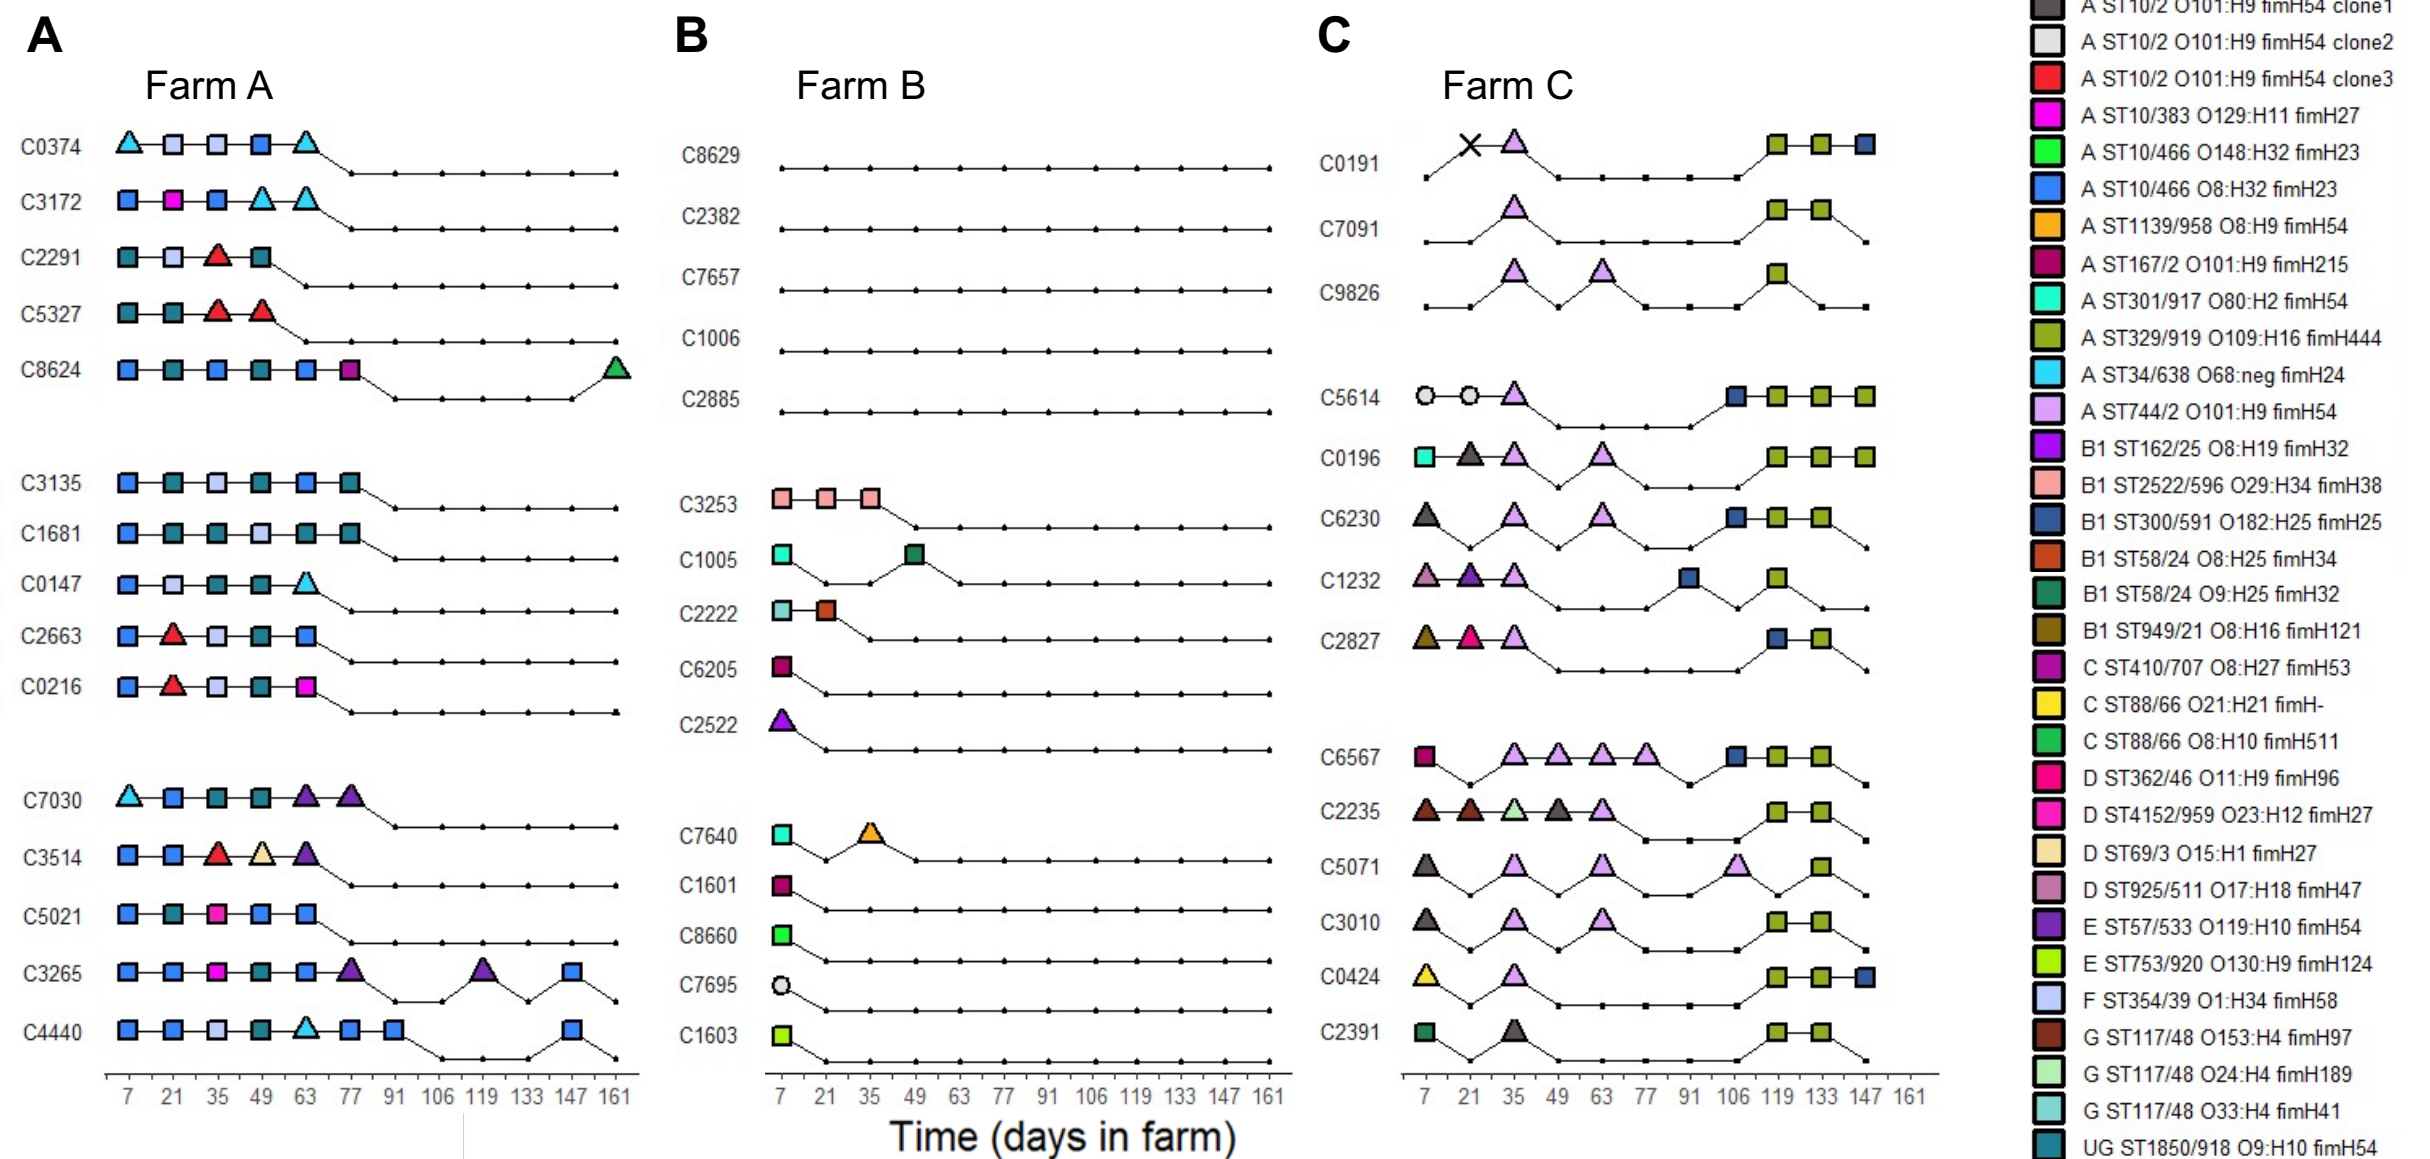

**Fig. 4. Characterization of *E. coli* clone and plasmid combinations carrying *bla*<sub>CTX-M-1</sub> gene.** Number of isolates for each ESBL-producing *E. coli* clones carrying the *bla*<sub>CTX-M-1</sub> gene and its molecular supports. Genotyping methods involving PFGE and followed by WGS were used to discriminate bacterial clones. Plasmids carrying a *bla*<sub>CTX-M</sub> gene were characterized using WGS after conjugation in a K-12 strain. The number of SNPs on the plasmid core genome was used to discriminate plasmid lineages, using a threshold of 100 SNPs. For each ESBL-producing *E. coli* clone, we looked for the presence of the plasmid carrying *bla*<sub>CTX-M</sub> gene in all of its isolates by replicon typing. When needed, the discriminant allele of the pMLST scheme was sequenced.

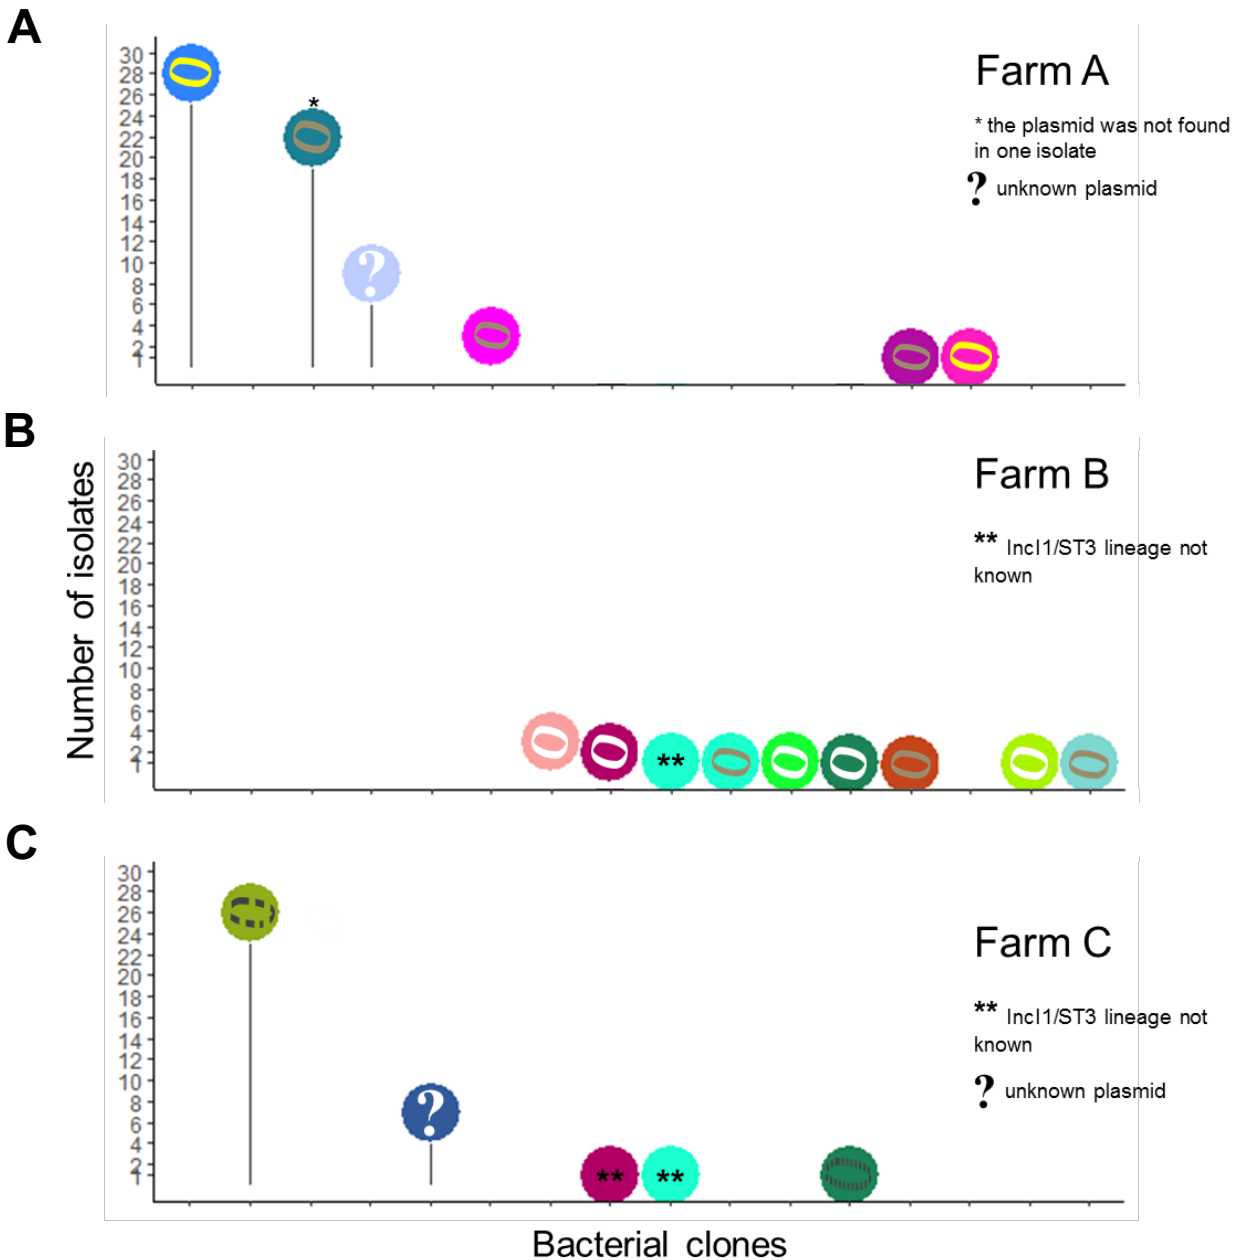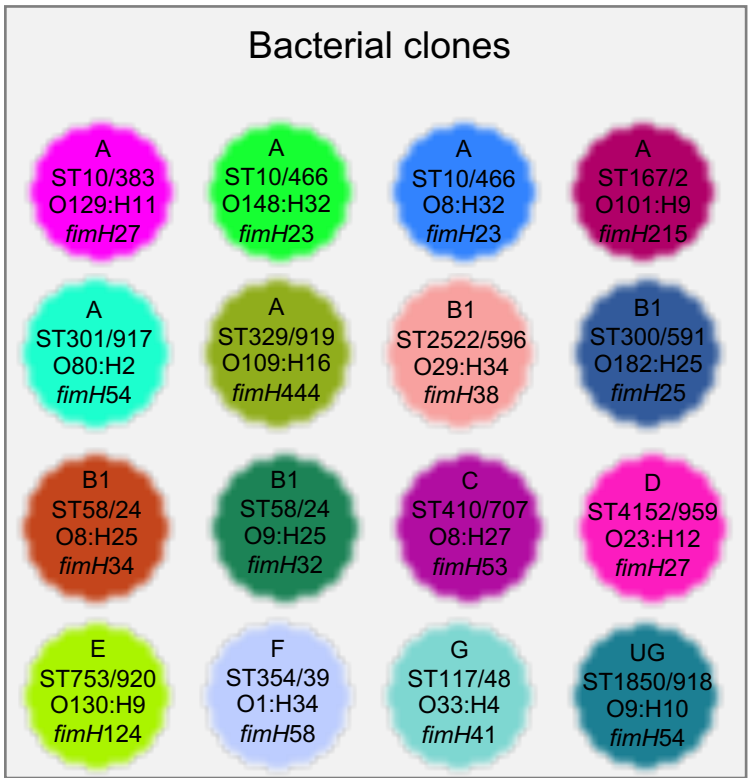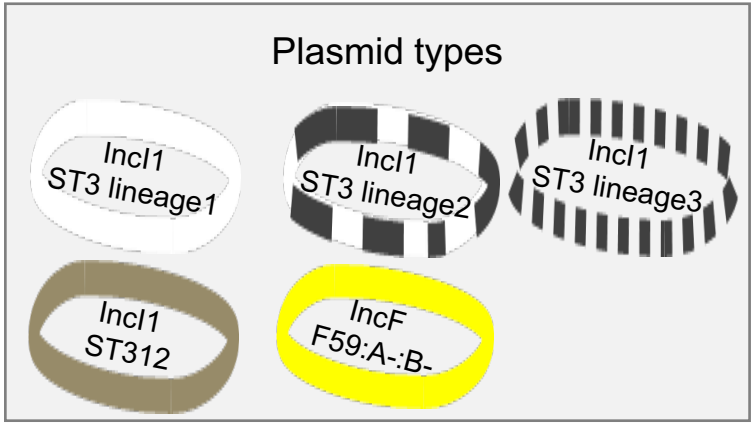

**Fig. 5. Characterization of *E. coli* clone and plasmid combinations carrying *bla*<sub>CTX-M-14</sub> gene.** Number of isolates for each ESBL-producing *E. coli* clones carrying the *bla*<sub>CTX-M-14</sub> gene and its molecular supports. Genotyping methods involving PFGE and followed by WGS were used to discriminate bacterial clones. Plasmids carrying a *bla*<sub>CTX-M</sub> gene were characterized using WGS after conjugation in a K-12 strain. The number of SNPs on the plasmid core genome was used to discriminate plasmid lineages, using a threshold of 100 SNPs. For each ESBL-producing *E. coli* clone, we looked for the presence of the plasmid carrying *bla*<sub>CTX-M</sub> gene in all of its isolates by replicon typing. When needed, the discriminant allele of the pMLST scheme was sequenced (FII allele in the FAB formula, *ardA* gene in the IncI1 pMLST scheme).

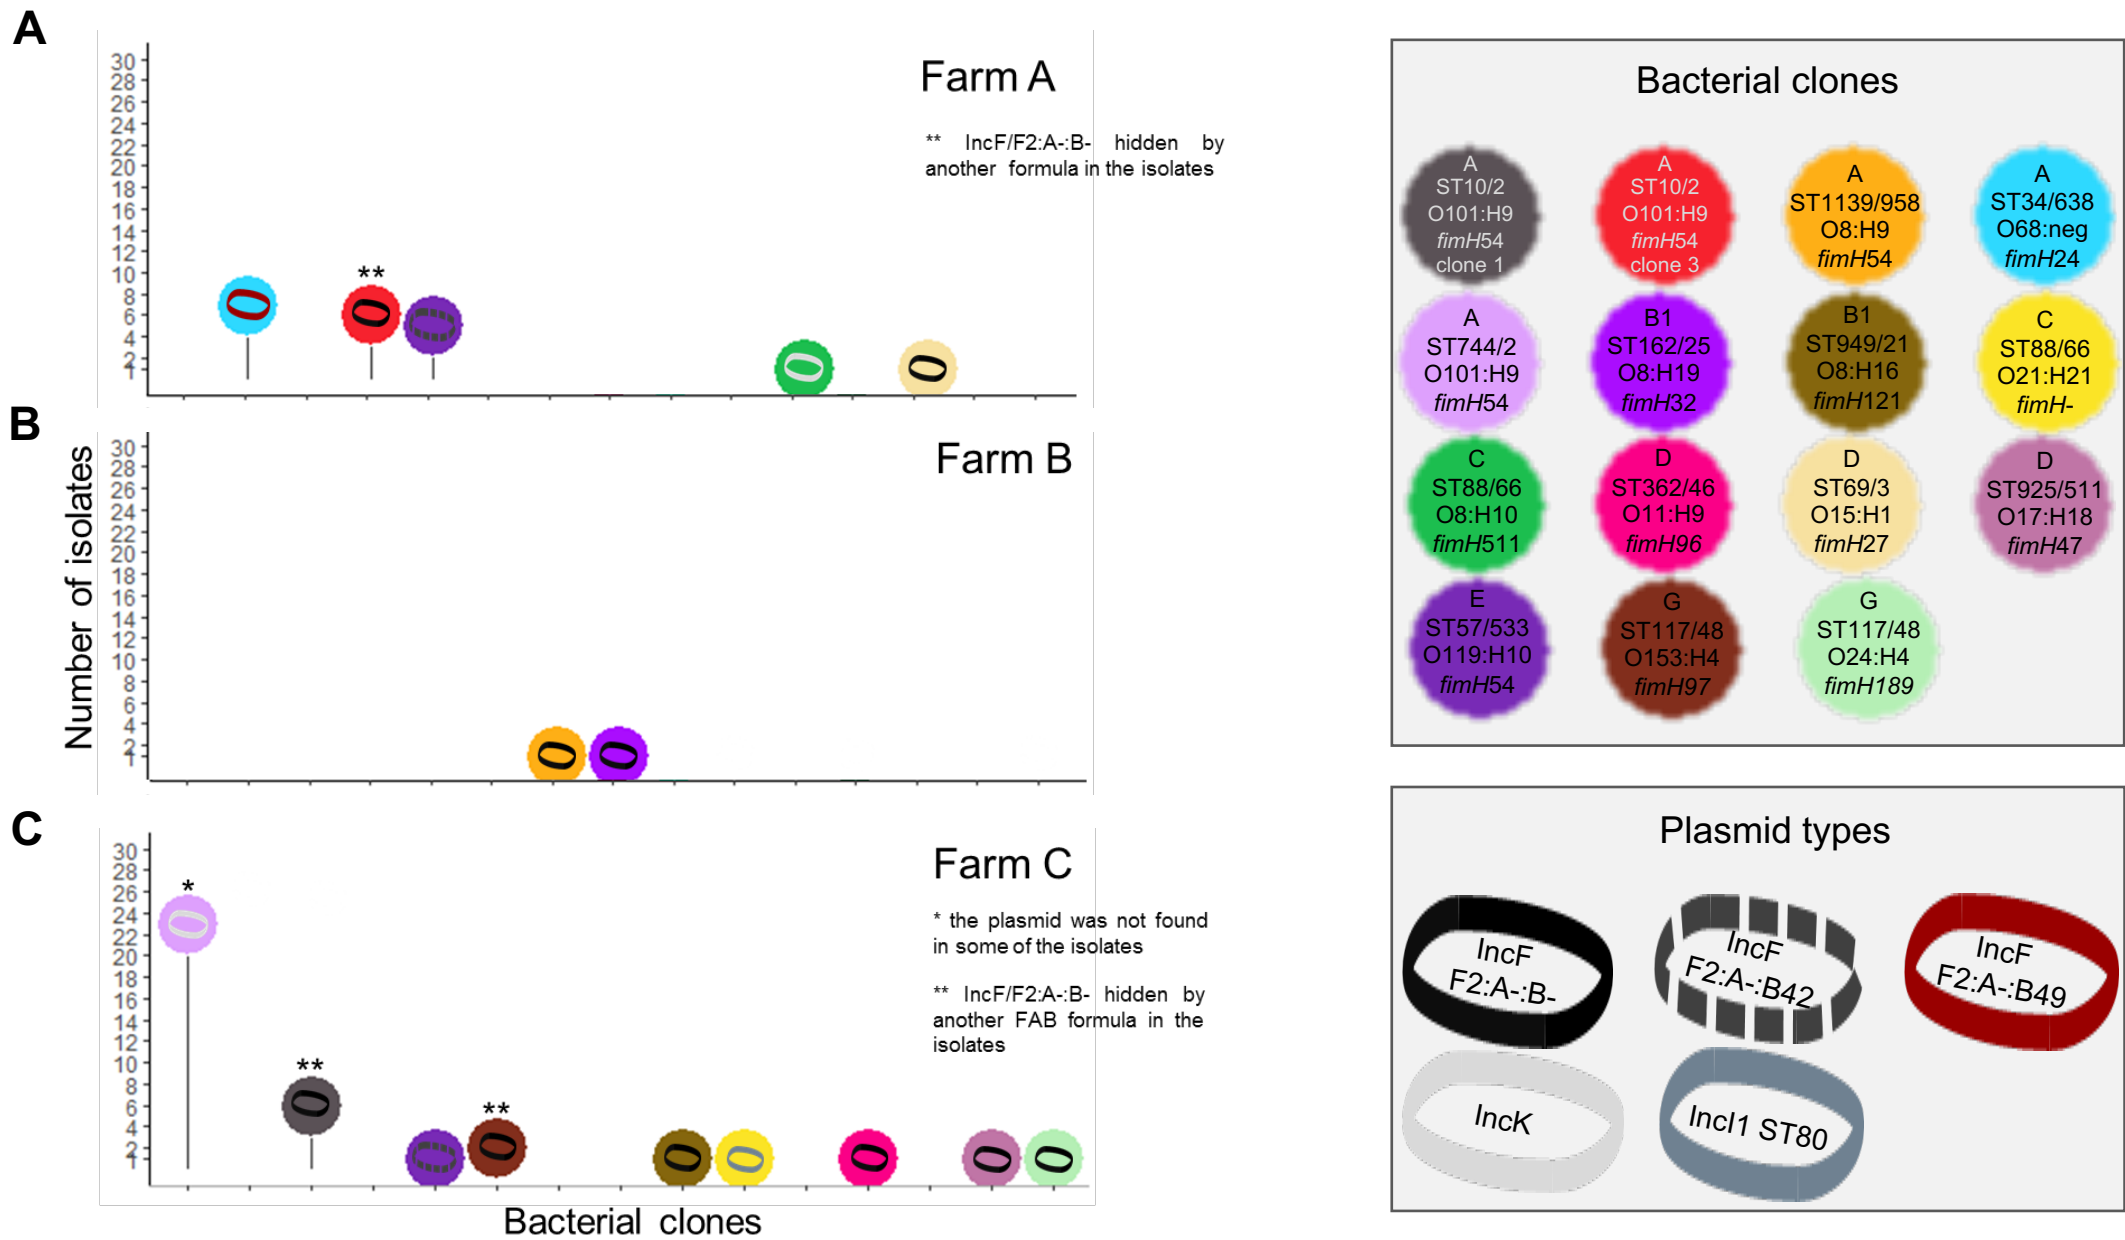

**Fig. 6. Number of calves colonized by ESBL-producing *E. coli* clones according to their duration of detection in farms.** The duration of detection of each clone is represented on the x-axis, and corresponds to the difference between the last day and the first day a clone was detected in a farm. The y-axis represents the number of calves within a farm in which clones were detected. Each dot represents an ESBL-producing *E. coli* clone, and its shape represents the *bla*<sub>CTX-M</sub> gene it carried. The size of clones found in several farms is increased compared to the clones that were detected in one farm. For clones that were found in several farms, the longest detection time and the highest number of calves colonized is provided. A zoom on the clones found at only one sampling time was added to increase the readability of the figure.

$\beta$ -lactamase genes detected  
 □ : *bla*<sub>CTX-M 1</sub>  
 △ : *bla*<sub>CTX-M 14</sub>  
 ○ : *bla*<sub>CTX-M 15</sub>

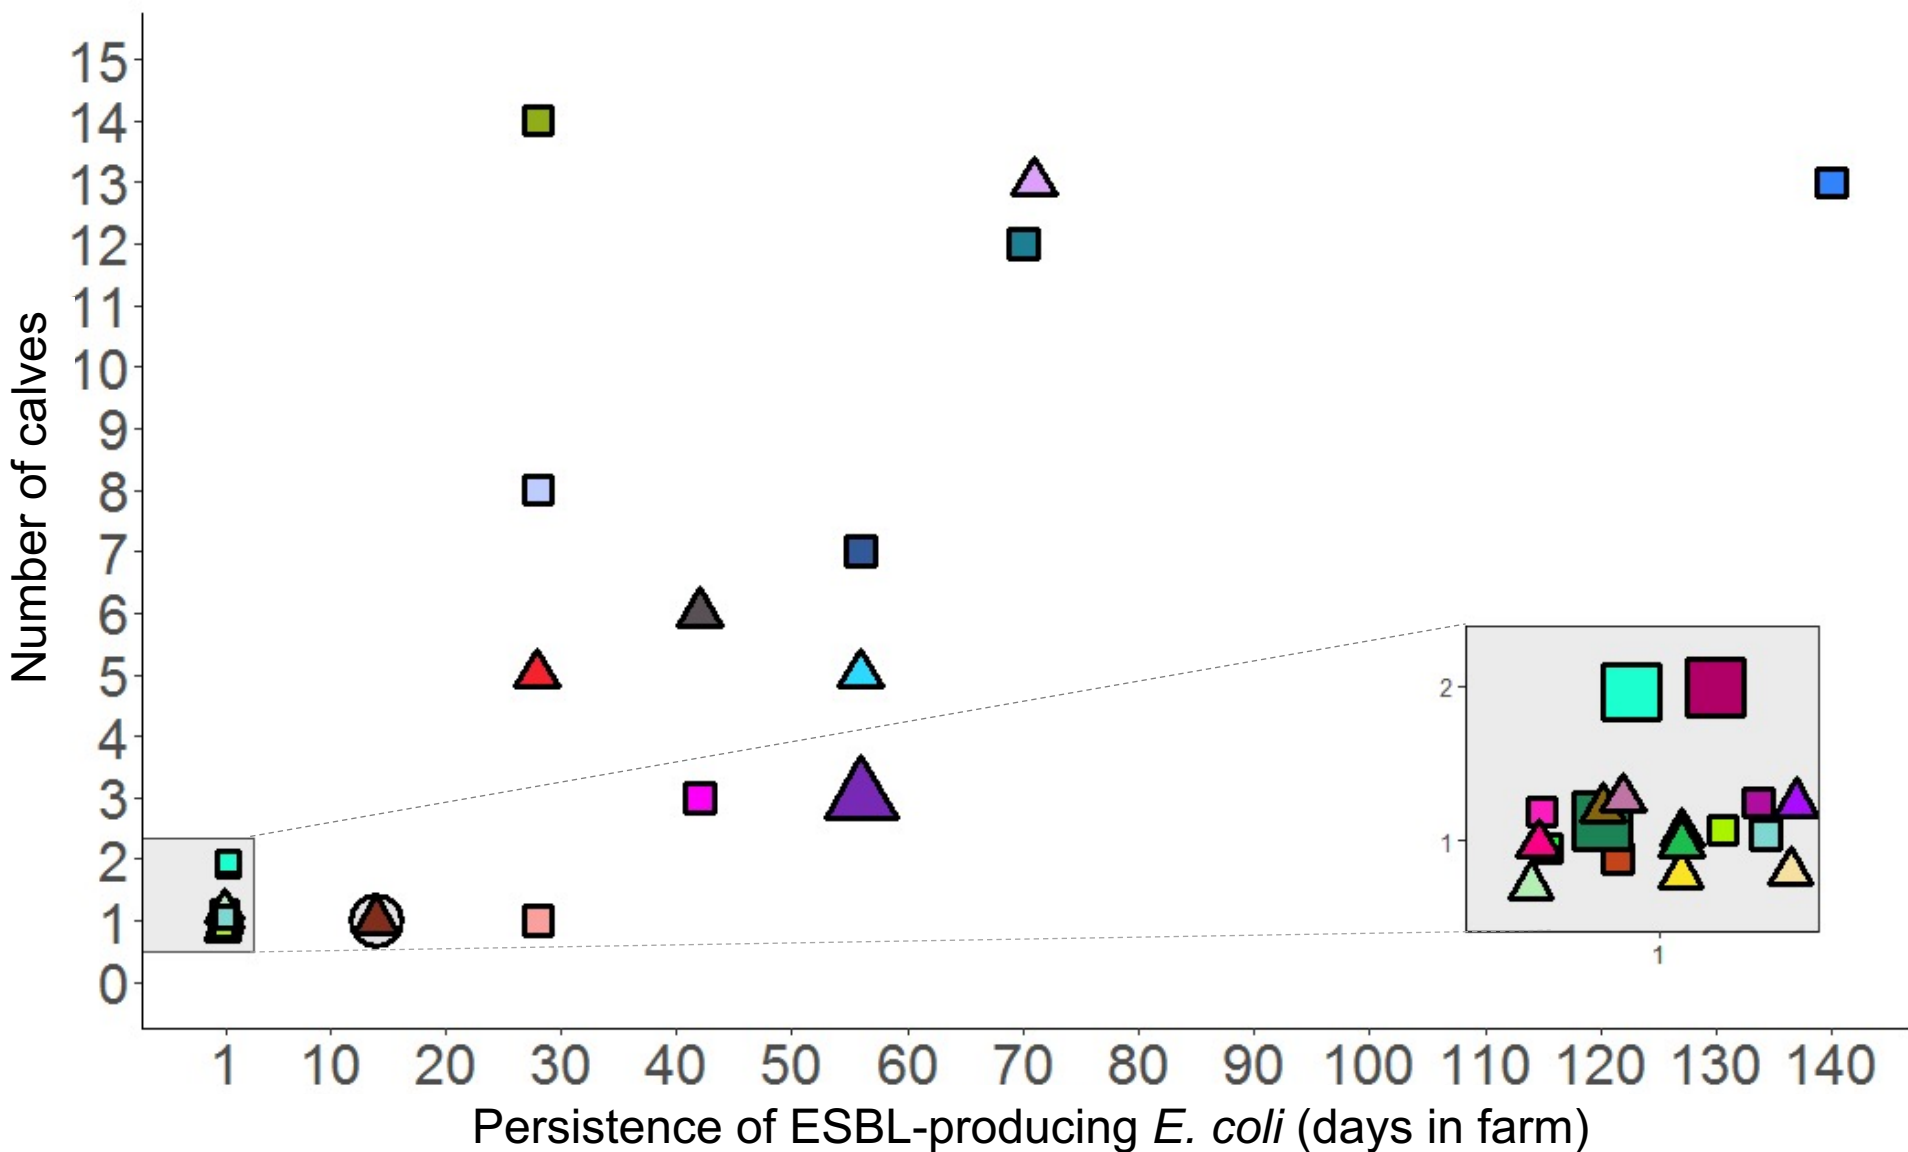

- Clones**
- A ST10/2 O101:H9 fimH54 clone1
  - A ST10/2 O101:H9 fimH54 clone2
  - A ST10/2 O101:H9 fimH54 clone3
  - A ST10/383 O129:H11 fimH27
  - A ST10/466 O148:H32 fimH23
  - A ST10/466 O8:H32 fimH23
  - A ST1139/958 O8:H9 fimH54
  - A ST167/2 O101:H9 fimH215
  - A ST301/917 O80:H2 fimH54
  - A ST329/919 O109:H16 fimH444
  - A ST34/638 O68:neg fimH24
  - A ST744/2 O101:H9 fimH54
  - B1 ST162/25 O8:H19 fimH32
  - B1 ST2522/596 O29:H34 fimH38
  - B1 ST300/591 O182:H25 fimH25
  - B1 ST58/24 O8:H25 fimH34
  - B1 ST58/24 O9:H25 fimH32
  - B1 ST949/21 O8:H16 fimH121
  - C ST410/707 O8:H27 fimH53
  - C ST88/66 O21:H21 fimH-
  - C ST88/66 O8:H10 fimH511
  - D ST362/46 O11:H9 fimH96
  - D ST4152/959 O23:H12 fimH27
  - D ST69/3 O15:H1 fimH27
  - D ST925/511 O17:H18 fimH47
  - E ST57/533 O119:H10 fimH54
  - E ST753/920 O130:H9 fimH124
  - F ST354/39 O1:H34 fimH58
  - G ST117/48 O153:H4 fimH97
  - G ST117/48 O24:H4 fimH189
  - G ST117/48 O33:H4 fimH41
  - UG ST1850/918 O9:H10 fimH54



**Fig. 7. Detection of ESBL-producing *E. coli* clones carrying the *mcr-1* gene and characterization of *mcr-1* gene-carrying *E. coli* clone and plasmid combinations in farm A.** Panel A represents samples in which ESBL-producing *E. coli* isolates carrying the *mcr-1* gene (big black dots) in farm A. In each isolate, detection of the *mcr-1* gene was done by PCR. Dots linked by a line are the samples of the same calf, which ID is provided on the left of each line. Calves are clustered according to the pen they shared. Genotyping methods involving PFGE and followed by WGS were used to discriminate bacterial clones. Plasmids carrying the *mcr-1* gene were characterized using WGS after conjugation in a K-12 strain. The number of Single Nucleotide Polymorphisms (SNPs) on the plasmid core genome was used to discriminate plasmid lineages, using a threshold of 100 SNPs. Panel B represents the number of isolates per combination carrying the *mcr-1* gene in farm A. As the *mcr-1* gene was not found in all the isolates of a given ESBL-producing *E. coli* clone, transparent dots representing the total number of isolates of a given clone were added. For each ESBL-producing *E. coli* clone, we looked for the presence of the plasmid carrying the *mcr-1* gene in all of its isolates by replicon typing.

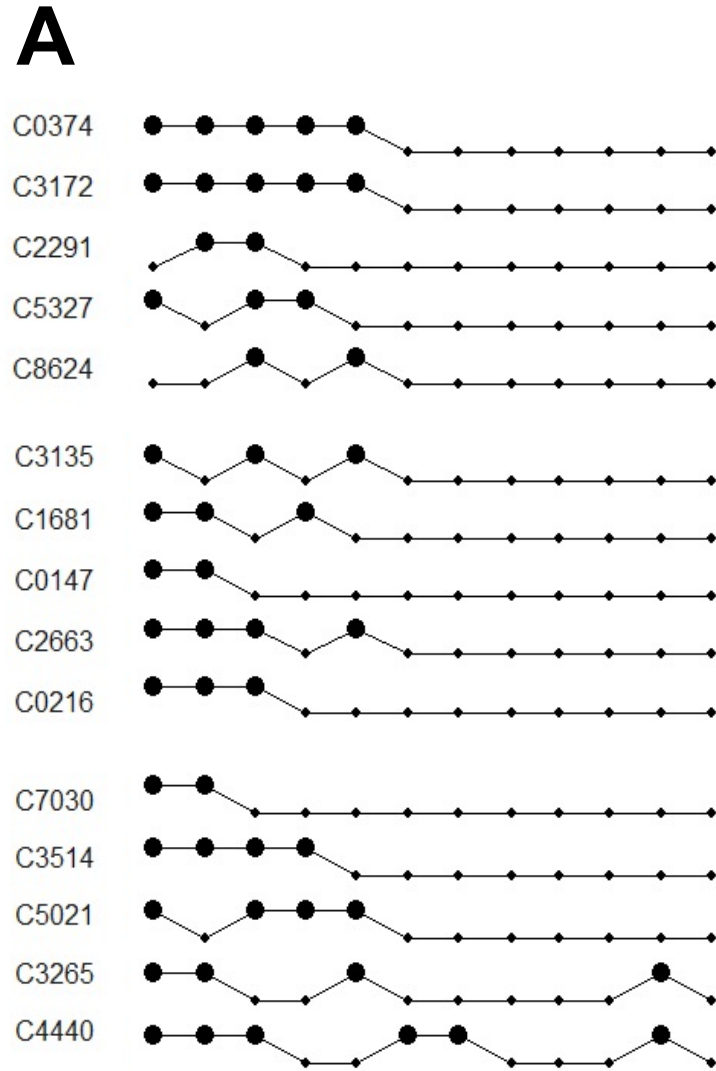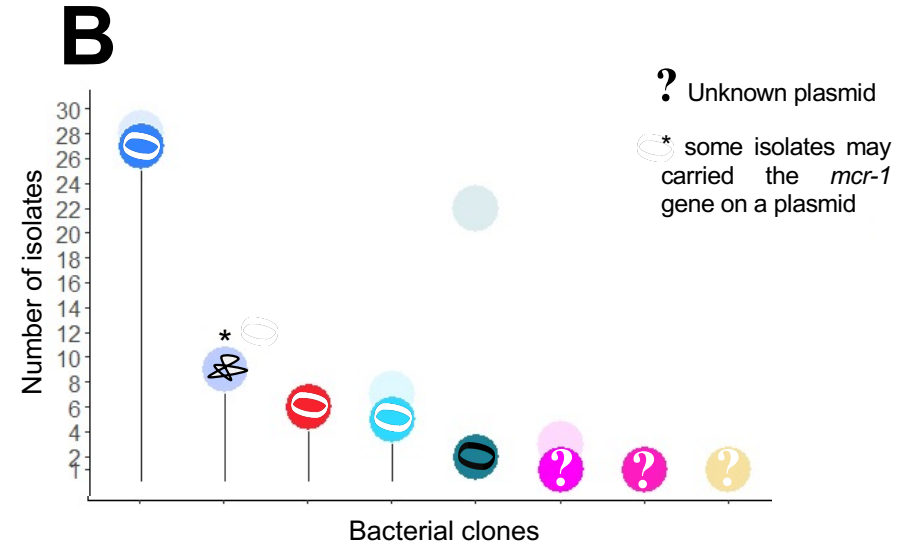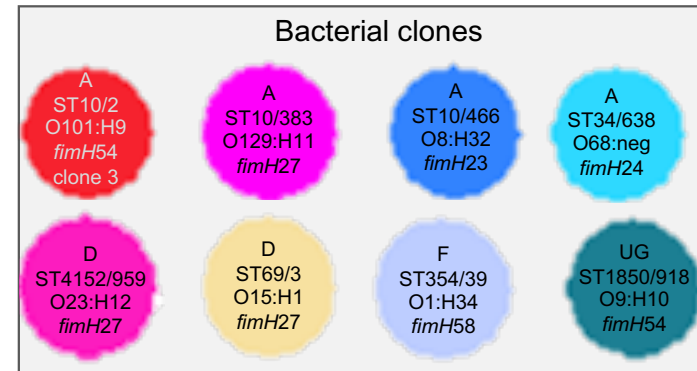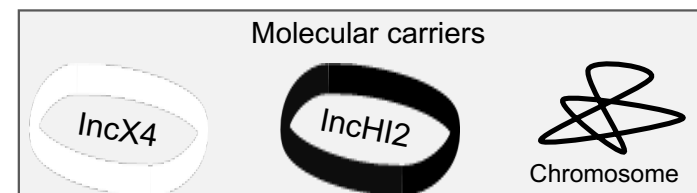

Source: https://www.biorxiv.org/content/10.1101/2021.06.19.449090v1.full.pdf
